# Supplementary material for: Volatiles Influencing Sensory Attributes and Bayesian Modeling of the Soluble Solids–Sweetness Relationship in Strawberry
Source: Front Plant Sci. 2021 Mar 17;12:640704. doi: 10.3389/fpls.2021.640704 (PMC8010315; doi:10.3389/fpls.2021.640704)
Supplement: Supplementary Table 4 — Importance index of all volatiles. Other tabs include PLS results for individual sensory attributes, including VIP scores and coefficients for each volatile. [file Table_4.XLSX]

## Sheet: Summary
Table S4. Importance index of all volatiles. Other tabs include PLS results for individual sensory attributes, including VIP scores and coefficients for each volatile.
Code	Chemical	Sweetness	Sourness	Astringent	Strawberry	Green	Overripe	Woody
SSC	SSC	7	-2	-2	6	-4	2	-2
TA	TA	2	7	4	3	1	1	-2
SSC/TA	SSC/TA	5	-7	-6	5	-5	-1	1
Mean_Firm	Sensory_Firmness	-1	-1	-3	-2	5	-6	-3
v1	alpha-Terpineol	0	0	0	0	4	1	0
v2	beta-Myrcene	1	1	-3	0	1	-1	-5
v3	gamma-Dodecalactone	2	-1	-3	0	0	3	1
v4	Nerolidol	-2	0	1	-2	-1	-2	1
v5	Acetic acid, 3-methylbutyl ester	0	0	0	0	-1	0	0
v6	gamma-Decalactone	0	-1	1	2	0	4	1
v7	2,3-Butanedione	0	-3	-1	0	1	0	1
v8	2-Butanone	1	-2	1	1	-1	2	0
v9	2-Heptanone	1	-1	-1	3	1	-2	-2
v10	Acetic acid, (Z)-2-hexenyl ester	-2	1	2	-1	1	1	-2
v11	2-Hexenal, (E)-	0	-1	-3	-1	-1	-2	-2
v12	2-Pentenal, (E)-	4	1	-2	3	-1	-1	1
v13	Mesifuran	3	-2	-2	2	-1	-1	0
v14	5-Hepten-2-one, 6-methyl-	1	1	-2	1	-1	-2	-3
v15	Acetic acid, 2-phenylethyl ester	-1	-2	-1	-1	0	1	-1
v16	Acetic acid, butyl ester	-2	1	1	-1	3	0	1
v17	Acetic acid, hexyl ester	-4	2	2	-1	1	0	-2
v18	Acetic acid, methyl ester	-3	2	-1	-3	2	-1	3
v19	Acetic acid, nonyl ester	-2	3	2	-1	2	2	0
v20	Acetic acid, octyl ester	0	0	0	-1	-1	-1	0
v21	Acetic acid, pentyl ester	3	-3	1	1	0	-1	-1
v22	Acetic acid, phenylmethyl ester	-1	-1	-1	0	-2	-1	-2
v23	Benzaldehyde	6	-4	0	4	-1	0	1
v24	Butanethioic acid, S-methyl ester	0	-1	-2	0	-2	3	2
v25	Butanoic acid, 3-methyl-, ethyl ester	3	0	0	1	-1	1	1
v26	Butanoic acid, 3-methylbutyl ester	3	-1	2	3	0	2	3
v27	Butanoic acid, butyl ester	1	4	1	0	1	1	3
v28	Butanoic acid, ethyl ester	2	2	2	2	0	-1	1
v29	Butanoic acid, hexyl ester	3	-3	1	3	2	1	2
v30	Butanoic acid, methyl ester	-2	2	0	-1	0	0	-1
v31	Butanoic acid, octyl ester	2	-5	-3	1	0	-1	1
v32	Butanoic acid, propyl ester	-2	2	1	-1	0	0	0
v33	Carbon disulfide
v34	(Z)-Linalool oxide	1	5	3	0	1	1	2
v35	Disulfide, dimethyl
v36	D-Limonene	1	0	0	0	-1	1	-2
v37	Acetic acid, ethyl ester	0	-3	1	0	1	-3	2
v38	Furan, 2-methyl-
v39	Hexanal	-1	-2	-3	-3	-1	-1	0
v40	Hexanoic acid	0	-1	-2	-1	-1	2	0
v41	Hexanoic acid, 1-methylethyl ester	1	1	-1	2	0	-2	-4
v42	Hexanoic acid, ethyl ester	2	1	0	2	-2	0	0
v43	Hexanoic acid, hexyl ester	2	-2	-3	2	-3	3	0
v44	Hexanoic acid, methyl ester	-2	3	-1	-1	-1	-3	0
v45	Hexanoic acid, octyl ester	2	-1	-3	3	-2	0	1
v46	Hexanoic acid, propyl ester	3	0	-2	3	-3	2	2
v47	Acetic acid, 1-methylethyl ester	-4	2	0	-4	0	-1	2
v48	Butanoic acid, 1-methylethyl ester	1	2	1	1	0	-1	1
v49	Linalool	-1	0	-2	-1	3	2	1
v50	Methanethiol	-3	2	0	-2	4	0	1
v51	2-Pentanone, 4-methyl-	2	-2	0	2	-2	2	1
v52	Butanoic acid, 3-methyl-, methyl ester	0	2	2	2	3	1	0
v53	Acetic acid, thio-, S-methyl ester	-1	-2	-2	1	-1	0	-1
v54	Pentanoic acid, methyl ester	-1	3	0	-1	0	0	-2
v55	Myrtenyl acetate
v56	Nonanal	4	-4	-4	4	-5	2	-2
v57	Acetic acid, propyl ester	-3	2	1	-3	-1	2	2
v58	Octanoic acid, ethyl ester	3	0	0	2	-1	0	-2
v59	Octanoic acid, methyl ester	0	1	-3	-1	-2	0	-1
v60	Pentanal	2	0	3	1	3	0	1
v61	Pentanoic acid, ethyl ester	2	3	0	1	-2	0	-1
v62	Propanoic acid, ethyl ester	-1	-1	1	-2	3	-4	0
v63	2-Hexen-1-ol, (E)-	0	0	2	0	-3	2	-1
v64	Butanoic acid	1	-1	0	-1	0	2	1
v65	Butanoic acid, 2-methyl-	1	-1	1	1	-3	2	-2
v66	Butanoic acid, 2-methyl-, ethyl ester	-3	-3	-1	-4	-2	-3	-3
v67	Butanoic acid, 2-methyl-, methyl ester	-2	1	1	-1	-1	1	0
v68	Butanoic acid, 3-methyl-	3	0	0	1	1	2	1
v69	delta-Decalactone
v70	Furaneol
v71	Furan, 3-methyl-

## Sheet: Mean_Sweetness
		2009		2010		2015		2016		2017		2018		2019
		Coef	VIM	Coef	VIM	Coef	VIM	Coef	VIM	Coef	VIM	Coef	VIM	Coef	VIM
SSC		0.0112961	1.08828	0.104227	1.94568	0.166714	2.34999	0.134003	2.36682	0.121877	2.24645	0.0890178	2.12393	0.133696	2.15082
TA		-0.0895459	1.41051	-0.0498097	0.797282			0.0607889	0.887996	0.0413973	1.57881	0.0716448	1.40812	0.0839957	1.51946
SSC/TA		0.0674459	1.69878	0.110134	1.99466			0.106586	1.96627	0.085194	1.28657	0.0107922	0.893432	0.113573	1.58895
Mean_Firm				0.0724806	1.27815	-0.0358501	0.455625	-0.102171	1.52062	-0.0219617	0.555553	-0.00145229	1.14556	0.0418084	0.658745
v1	alpha-Terpineol	0.00996598	1.07177	-0.0266366	0.738304	-0.0715093	1.27079	-0.015912	0.443126	-0.00134421	0.790644	-0.00276353	0.402823	0.0120548	0.313352
v2	beta-Myrcene	0.0403867	1.23503	0.036058	0.784816	-0.0505102	0.879893	-0.00995027	0.876228	0.0156872	0.423265	-0.0299422	0.734583	-0.00258731	0.311046
v3	gamma-Dodecalactone	0.0415913	1.2417	-0.0199519	0.814319	0.0235553	1.02416	-0.0314896	0.428545	-0.00980574	0.801449	0.0172597	0.926714	0.00715773	0.70252
v4	Nerolidol	-0.0372045	0.618506	-0.0326308	0.712172	-0.0269548	0.944838	-0.0157038	0.211519	-0.0597416	1.23079	0.00295473	0.679368	-0.065136	1.06382
v5	Acetic acid, 3-methylbutyl ester	0.0607756	0.783874	-0.0328705	0.889066	-0.0814094	1.22867	-0.00712633	0.624305	0.0632599	1.61917	-0.0455522	0.88689	-0.0462412	0.747466
v6	gamma-Decalactone	0.0240232	1.23642	0.0168737	0.834525	-0.023288	1.08762	-0.0315255	0.383094	0.016393	0.701485	-0.00257575	0.750124	-0.0123373	0.829248
v7	2,3-Butanedione	0.0700193	1.43183	0.0029485	0.726753	0.0162322	0.765169	-0.0662475	0.741928	-0.0725794	1.66035	-0.00786595	0.648475	-0.0534182	0.900441
v8	2-Butanone	0.070658	1.56903	-0.000464375	0.518956	0.0298321	0.824817	-0.049176	0.684914	-0.0358571	1.48873	0.0022247	0.590241	0.0239928	1.03089
v9	2-Heptanone	-0.0130776	1.06801	0.00322206	1.23132	0.0626343	1.42511	-0.00937869	0.637839	0.0145415	0.546925	-0.0341046	0.720312	-0.0238215	0.625918
v10	Acetic acid, (Z)-2-hexenyl ester	-0.0335134	1.27562	-0.0452181	0.979599	-0.0376749	0.652123	-0.0856644	2.05979	0.0224523	0.698558	-0.0277039	0.859551	-0.0112159	0.714547
v11	2-Hexenal, (E)-	-0.0647851	0.827733	-0.00947028	1.21775	0.0355504	0.877371	0.0898206	1.63239	0.0325242	0.676176	-0.030383	0.894949	0.0200172	0.938864
v12	2-Pentenal, (E)-	0.0233371	0.519385	0.00722426	0.840455	0.0413121	0.529575	0.0866864	1.15016	0.0405165	1.01233	0.01647	1.36159	0.0295578	1.26512
v13	Mesifuran	0.0259892	1.01944	0.0680638	1.54379	0.0148402	0.28372	0.0660838	1.16553	0.0066645	0.407545	0.00715955	0.767109	-0.0278507	0.643975
v14	5-Hepten-2-one, 6-methyl-	0.0375351	1.49318	0.024081	0.860331	0.019118	1.01745	0.00032346	0.682192	-0.0287766	0.845539	-0.0413436	0.836805	-0.096171	1.21688
v15	Acetic acid, 2-phenylethyl ester	0.0175616	0.636798	-0.00123485	0.75284	-0.0355979	0.778104	-0.0568832	1.12715	-0.00683811	0.908611	0.0158542	0.815498	-0.0240321	0.428326
v16	Acetic acid, butyl ester	0.00127899	0.101211	-0.0203085	0.917422	-0.0107158	0.915759	-0.0386431	0.563578	-0.0534329	1.06173	0.011155	0.708604	-0.054743	1.10807
v17	Acetic acid, hexyl ester	-0.00115379	0.398126	-0.000741124	1.26819	-0.0134538	1.19664	-0.0860969	1.98023	-0.00626491	0.31264	0.0195081	0.93342	-0.0177241	1.00558
v18	Acetic acid, methyl ester	-0.00907599	0.887099	0.0124689	0.84601	-0.0538512	1.20285	0.07388	0.834972	-0.014338	0.984395	-0.0485631	1.55052	-0.080764	1.31994
v19	Acetic acid, nonyl ester	0.0373236	0.914506	-0.0239301	0.427062	-0.0872448	1.27029	0.0229093	0.522612	-0.00732595	0.352094	0.00274893	0.542013	-0.0659907	1.31403
v20	Acetic acid, octyl ester	0.01363	0.205086	0.0145447	1.13932	0.0124196	1.06037	-0.0192497	0.542148	-0.0525019	1.1992	0.00981312	0.768966	-0.0473575	1.14186
v21	Acetic acid, pentyl ester	-0.0175546	0.73798	0.0660296	1.42354	0.00343616	1.17577	-0.0234965	0.661838	-0.040862	0.658506	0.0093943	0.850349	0.00547307	1.3233
v22	Acetic acid, phenylmethyl ester	-0.0842969	1.06645	-0.0515077	1.15973	0.0430848	0.683098	-0.0280258	0.648711	0.031274	0.562297	-0.00112029	0.67733	0.101646	1.40462
v23	Benzaldehyde	0.076411	1.358	-0.00111033	0.610713	0.105659	1.74748	0.0820806	1.07068	0.0715326	1.14407	0.0501448	1.56766	0.0874959	1.51333
v24	Butanethioic acid, S-methyl ester	0.0588546	0.702575	0.0531758	1.04774	0.0238975	0.368681	0.0271485	0.776031	0.033153	0.82363	-0.0587003	1.53463	0.0236652	0.760132
v25	Butanoic acid, 3-methyl-, ethyl ester	-0.0333709	0.701017	0.00512597	1.04763	-0.0274165	0.470384	0.0220772	0.642446	0.0580193	1.52302	-0.0232557	0.721298	0.0662233	1.05016
v26	Butanoic acid, 3-methylbutyl ester	0.0485552	1.25304	0.0701447	1.58071	-0.038219	0.520051	0.0163905	0.554606	0.038184	1.56815	-0.0412388	0.982421	-0.00896727	0.809055
v27	Butanoic acid, butyl ester	0.003128	0.94856	0.00911791	1.25204	-0.00644616	0.565551	0.0234611	0.785286	-0.00428572	0.538652	0.00557145	0.789076	0.0280338	0.835962
v28	Butanoic acid, ethyl ester	-0.0438175	0.839936	-0.000614407	0.860309	0.0334053	1.11329	-0.00562572	0.839773	-0.0153521	0.25138	-0.00672165	0.530898	0.0285212	1.07123
v29	Butanoic acid, hexyl ester	0.029409	1.19525	0.0205058	1.20108	-0.0444737	0.95585	-0.0114213	0.496866	0.0777381	1.40398	-0.000391544	0.730118	0.0281428	0.774695
v30	Butanoic acid, methyl ester	0.0232498	0.512015	-0.0211984	0.49588	-0.00309389	0.386045	0.0194736	0.638639	0.0294633	0.744869	-0.0328716	1.16088	-0.0431496	1.22407
v31	Butanoic acid, octyl ester	0.0260518	1.12706	0.0577531	1.82191	0.035431	0.964209	0.0058076	0.54237	-0.021116	0.708522	0.0226784	0.948491	0.00625047	0.827681
v32	Butanoic acid, propyl ester	0.033096	0.785996	-0.0229302	1.03856	0.0353553	0.981885	-0.0243875	1.33313	-0.00803402	0.768967	0.000331618	0.854842	0.00812897	0.807245
v33	Carbon disulfide	0.0643453	1.13371	0.0225158	0.784017	-0.00157085	0.87873	0.0665258	1.53529	-0.0551629	1.17328	-0.0457567	1.35981	-0.00692146	0.718439
v34	(Z)-Linalool oxide	0.075914	1.06828	0.0495512	0.787932	-0.00975277	0.662805	0.00587168	0.208911	0.0192336	0.803124	0.0109113	0.351644	-0.0561453	0.784783
v35	Disulfide, dimethyl	0.0638593	1.00455	0.0020498	0.671482	-0.00660436	0.492866	0.0176258	1.24067	0.00663816	0.71693
v36	D-Limonene	0.0537841	1.34858	0.0396458	0.528497	-0.0104732	0.777502	0.0298242	0.554767	0.0560149	0.824672	0.00305164	0.618165	-0.00463266	0.431003
v37	Acetic acid, ethyl ester	-0.0412548	0.596666	0.0058447	0.825124	-0.0223942	1.02209	0.0506577	1.16101	-0.0502913	1.38395	-0.027694	0.966104	0.0151734	1.18927
v38	Furan, 2-methyl-	0.0550952	1.38685	-0.0180848	0.832577	0.0671937	0.914894	0.0224555	0.618643	0.0874975	1.36379
v39	Hexanal	0.00655617	1.02497	-0.0648291	1.31732	-0.0578439	1.32704	0.023671	0.781696	0.0280053	0.476638	-0.0320381	0.980068	-0.0316889	0.511091
v40	Hexanoic acid	0.0113224	0.499767	-0.0659312	0.923444	-0.014076	1.01588	0.0166625	1.02992	0.0309813	0.816227	0.0327395	0.761491	0.0257397	0.814337
v41	Hexanoic acid, 1-methylethyl ester	-0.0233458	0.901388	-0.0303376	0.532297	0.0119302	1.00889	0.00699412	0.407967	0.0158075	0.572228	0.0313268	0.867329	0.0439835	0.943487
v42	Hexanoic acid, ethyl ester	-0.0567212	0.950531	-0.00601021	0.846302	0.0419523	1.35204	-0.000366182	0.920435	-0.0321416	0.593528	0.0261673	0.794543	0.013498	1.01576
v43	Hexanoic acid, hexyl ester	0.0144389	1.14401	0.0205129	1.44413	-0.0218385	1.06347	-0.0136025	0.61822	0.0652406	1.12819	-0.0162753	0.702325	0.0514715	0.983609
v44	Hexanoic acid, methyl ester	0.0322102	0.382705	-0.0169767	0.416768	0.0411671	0.882385	0.0158285	0.469886	0.00139719	0.493396	-0.0120792	1.01348	-0.0331545	1.10163
v45	Hexanoic acid, octyl ester	0.00558964	0.961066	0.0616068	1.75653	0.0361432	1.05236	-0.0129826	0.313142	-0.0268609	0.791655	0.00839559	0.834643	0.000913241	0.753257
v46	Hexanoic acid, propyl ester	0.027336	1.01589	0.0747453	1.06974	0.0365175	1.30686	-0.00518882	1.13732	-0.0267499	0.872152	0.0441915	1.16861	0.0199067	0.932909
v47	Acetic acid, 1-methylethyl ester	-0.000328455	0.341873	0.00164049	0.740589	-0.0646006	1.21549	0.0233309	0.635408	-0.0409493	1.64853	-0.0498243	1.59391	-0.0533845	1.17143
v48	Butanoic acid, 1-methylethyl ester	-0.0241237	0.886702	0.0285933	1.03468	-0.0523475	0.663912	0.0235092	0.577657	0.0163692	0.576984	-0.0136947	0.616943	0.0257104	0.944153
v49	Linalool	0.0514237	0.651815	-0.0159692	0.742987	-0.0640756	1.21461	-0.00936351	0.10981	-0.00157657	0.431618	-0.0410003	0.959108	-0.0161849	0.502551
v50	Methanethiol	-0.00345453	1.12034	0.0353914	0.835816	0.0125221	0.33048	-0.026482	0.762913	-0.0237839	1.08406	-0.0349009	1.18568	-0.0451059	0.908895
v51	2-Pentanone, 4-methyl-	0.0653809	1.5283	-0.0259108	0.515202	-0.0168111	0.222237	0.0244468	0.676814	0.0695748	1.6644	-0.046242	0.985806	0.0233725	0.460079
v52	Butanoic acid, 3-methyl-, methyl ester	0.046567	1.03216	-0.0170394	0.812045	-0.0455771	0.846389	-0.0117483	0.881721	-0.0110456	0.270561	-0.0144194	1.02176	0.0218029	0.846809
v53	Acetic acid, thio-, S-methyl ester	0.0344408	0.463245	0.00485928	0.861107	0.0323206	0.420141	0.040442	0.995143	-0.00530206	0.580487	-0.00510592	1.15754	0.00745159	0.597776
v54	Pentanoic acid, methyl ester	-0.0585488	0.810469	-0.0112134	0.297871	0.00660273	0.177736	-0.00580107	0.487306	0.0235067	0.48161	-0.0444598	1.03291	-0.0142335	0.997515
v55	Myrtenyl acetate	0.0348066	0.504042	0.033485	0.761037	-0.11254	1.61064	-0.0485965	1.0051	-0.00320644	0.578064
v56	Nonanal	0.104527	1.89228	0.0325817	0.632452	0.10818	1.73735	0.0299963	1.0873	0.0215969	0.614563	0.00462445	1.22536	0.03473	0.611782
v57	Acetic acid, propyl ester	0.00283733	0.436058	-0.0324188	0.813575	-0.00700628	0.763927	-0.0383566	1.45764	-0.0254874	1.40449	-0.0524815	0.954651	-0.0175108	1.03137
v58	Octanoic acid, ethyl ester	-0.0301613	0.821517	0.00561797	1.1893	0.0277591	1.27988	-0.00530316	0.954917	-0.0275126	0.608981	0.0862835	1.64198	0.0104905	0.997098
v59	Octanoic acid, methyl ester	-0.0179833	0.338899	0.0035987	0.292599	0.0261634	1.04594	0.00522907	0.623913	-0.00275224	0.550386	-0.00647067	0.687012	-0.0241202	1.00255
v60	Pentanal	0.0353607	1.20879	0.066281	0.984335	0.0620617	0.810737	-0.0552082	1.499	-0.014836	0.381959	0.0497905	1.68515	0.0435182	1.44181
v61	Pentanoic acid, ethyl ester	0.0160053	1.00457	-0.00428817	0.884199	0.0224482	1.20993	-0.0633786	1.39574	-0.026215	0.658023	-0.018954	0.404188	0.0338146	1.09198
v62	Propanoic acid, ethyl ester	0.0149867	0.423562	-0.0111097	0.464444	0.0223266	0.853618	0.0270275	1.16487	-0.0239074	1.31985	-0.0302468	0.8348	-0.0108934	1.06806
v63	2-Hexen-1-ol, (E)-	-0.039621	0.608161	0.00101744	0.584001	-0.0613162	0.929816	-0.0345217	1.57202	0.0485492	0.879858	-0.053515	0.996467	0.0414863	1.27295
v64	Butanoic acid	-0.0467281	0.59177	0.0156918	1.08611	-0.0575963	0.975788	0.00718227	0.981016	0.00996015	0.899829	-0.0044366	0.285759	-0.0197008	0.848264
v65	Butanoic acid, 2-methyl-	0.0307731	1.19347	-0.00940474	0.691834	0.053984	0.869832	-0.0325549	0.407846	-0.00235168	0.743979	-0.0141021	0.479947	-0.0343736	0.96025
v66	Butanoic acid, 2-methyl-, ethyl ester	0.0243463	0.535339	-0.000899673	0.328229	0.0102633	0.701775	-0.0195723	1.33911	-0.0483951	1.71788	-0.042771	1.28951	-0.0162906	0.875526
v67	Butanoic acid, 2-methyl-, methyl ester	0.065368	0.952101	0.047211	0.797973	-0.00113961	0.775934	0.00674803	0.400149	0.0208681	0.948887	-0.0184971	1.37403	-0.0422576	1.11377
v68	Butanoic acid, 3-methyl-	0.0642165	1.25369	0.0127399	1.27447	-0.0115001	0.157146	0.0162649	0.946197	0.017698	1.1262	-0.0392491	0.975203	0.0361	0.518623
v69	delta-Decalactone											-0.0189734	0.723786	0.0110143	0.89079
v70	Furaneol											0.00522397	0.824809	-0.0349726	0.927202
v71	Furan, 3-methyl-											-0.00421004	1.29368	0.007202	1.31364
R2		92.01		77.44		83.24		92.79		82.95
RMSEP		0.6749		0.5632		0.6751		0.8703		0.5902

## Sheet: Mean_Sourness
		2009		2010		2015		2016		2017		2018		2019
		Coef	VIM	Coef	VIM	Coef	VIM	Coef	VIM	Coef	VIM	Coef	VIM	Coef	VIM
SSC		-0.0292219	0.874899	-0.0418869	0.878198	-0.0589662	1.69905	-0.0176337	1.10126	-0.0289074	0.693662	0.00121391	1.06845	-0.0334402	1.18692
TA		0.105711	1.98028	0.154744	2.41447	0.058652	1.00745	0.0671818	1.02745	0.0590274	1.46178	0.104977	1.49876	0.0436384	1.26483
SSC/TA		-0.0917184	1.95769	-0.161935	2.5428	-0.110048	2.27089	-0.0859714	1.80883	-0.098105	2.05861	-0.0834821	1.55489	-0.118111	2.58849
Mean_Firm				-0.0538528	1.1586	0.03244	0.765234	-0.00705394	0.556302	0.0267175	0.781519	-0.0145148	0.595515	0.0061998	0.343248
v1	alpha-Terpineol	-0.0331144	1.13551	-0.0445236	0.84872	0.0804688	1.40557	0.0037864	0.406743	-0.0159508	0.862543	-0.0400466	0.870216	-0.0218796	0.465236
v2	beta-Myrcene	-0.0202277	0.58881	-0.0474673	0.800256	0.0153929	1.04902	-0.0140021	0.461172	0.0277623	0.622892	-0.0123897	0.180659	-0.00915697	0.263004
v3	gamma-Dodecalactone	-0.0042862	0.691393	0.0017591	0.150407	-0.0194327	0.599656	0.0673819	0.880484	0.0275158	0.976143	-0.0225841	1.0768	0.00438785	0.820196
v4	Nerolidol	0.0151238	0.375535	0.0377082	0.795594	0.0178199	0.617649	-0.0137302	0.253326	0.0154422	0.326579	-0.0320229	0.992759	0.0278962	0.728763
v5	Acetic acid, 3-methylbutyl ester	-0.0677971	1.0624	0.0535694	1.15604	0.0236578	1.03862	-0.00945673	1.01103	-0.0380176	0.81916	0.00391896	0.634759	0.0319417	0.669593
v6	gamma-Decalactone	-0.0221079	1.23697	0.00180166	0.287402	0.0562795	0.970279	0.0481826	0.62358	0.0278384	0.915593	0.00196238	0.969844	0.0265673	0.981172
v7	2,3-Butanedione	-0.0654425	1.5514	-0.107123	1.57133	0.0210958	0.559212	-0.0825343	1.33361	0.0096006	0.764804	-0.0283652	0.924968	0.0322212	0.737776
v8	2-Butanone	-0.0617188	1.70477	-0.0628019	0.880104	0.0307228	0.925155	-0.0450929	0.660489	-0.01179	1.11051	0.0279603	0.823363	-0.00186921	0.865824
v9	2-Heptanone	0.00936194	1.34348	-0.0207906	1.30075	0.0409124	0.896917	0.0353636	0.759106	-0.0291577	1.06548	0.00558737	0.639106	0.0133073	0.555886
v10	Acetic acid, (Z)-2-hexenyl ester	0.0152801	0.651601	0.0479314	1.05129	-0.0327261	0.98634	0.0537815	1.55166	-0.0274043	1.167	-0.02792	0.931468	-0.00257096	0.795873
v11	2-Hexenal, (E)-	-0.0514387	0.916605	-0.0428115	0.779147	-0.0157558	0.752384	-0.0346922	0.855868	-0.0266831	1.10871	0.0181892	0.885472	-0.0116264	0.882556
v12	2-Pentenal, (E)-	-0.00509158	0.393014	0.0554929	1.1879	-0.0339749	0.799281	-0.0273554	0.457797	0.00793187	0.707628	-0.0265335	1.11512	0.011294	1.13262
v13	Mesifuran	-0.022845	0.919727	-0.0393415	0.936032	0.0344863	0.634162	-0.0807449	1.54394	-0.0462267	1.20189	0.000612254	0.942553	0.0154472	0.672049
v14	5-Hepten-2-one, 6-methyl-	-0.0241142	1.18089	-0.0136104	0.239766	-0.0112787	0.835192	-0.00563233	0.750155	0.0193505	0.628405	0.0906757	1.31152	0.056017	1.1979
v15	Acetic acid, 2-phenylethyl ester	-0.0465893	0.981454	0.00364506	0.67921	-0.0156635	0.595032	0.0458736	0.959678	-0.00652409	1.02491	-0.0169397	1.00707	0.0216982	0.493073
v16	Acetic acid, butyl ester	-0.0152084	0.663971	-0.00659895	0.88643	0.0154277	0.570789	0.0678727	1.09266	0.038696	0.963277	0.00499334	0.871679	-0.0153523	0.803911
v17	Acetic acid, hexyl ester	-0.0063636	0.478975	0.00551951	0.949817	-0.0336308	1.30167	0.0689105	1.62881	-0.0133472	0.951061	0.00289385	1.01393	0.02539	1.04391
v18	Acetic acid, methyl ester	-0.000466415	0.725853	0.00507276	0.530505	0.0316972	1.51968	0.00261759	0.202563	0.0147278	0.461045	0.0650673	1.29344	-0.0020416	0.405863
v19	Acetic acid, nonyl ester	0.0383197	0.677686	0.0451515	0.824795	0.0787256	1.56691	0.011146	0.302355	0.0649668	1.34327	-0.000528401	0.668499	0.0459058	1.33363
v20	Acetic acid, octyl ester	-0.0247151	0.846253	-0.0513682	1.23724	-0.0419411	0.927288	-0.0468894	0.709532	-0.0193817	0.945258	0.023629	1.01698	-0.00749949	0.790083
v21	Acetic acid, pentyl ester	0.0331986	0.511564	-0.0225334	0.732075	-0.0430026	1.23997	0.0548205	0.878974	0.0275382	0.9321	-0.0237053	1.08929	-0.0216165	1.15546
v22	Acetic acid, phenylmethyl ester	0.0279703	0.465502	-0.0495984	1.14722	0.0105334	0.695007	0.126897	1.708	-0.0192467	0.851621	0.00149112	0.867526	-0.0652662	1.41582
v23	Benzaldehyde	-0.0903507	1.39122	0.0404919	0.696316	-0.0616025	1.44414	-0.0493409	0.684344	-0.0374431	0.996368	-0.0334387	1.301	-0.0279683	1.13853
v24	Butanethioic acid, S-methyl ester	-0.0109189	0.596514	0.0337936	0.436041	-0.0519746	0.993313	-0.0525223	1.22536	-0.00734186	0.693565	0.017174	0.48294	0.00808468	0.802287
v25	Butanoic acid, 3-methyl-, ethyl ester	0.0260459	0.392787	-0.0209407	1.17307	-0.0338915	0.594275	0.00123887	1.06557	-0.0415196	0.919396	0.00926654	0.71246	-0.038082	0.861654
v26	Butanoic acid, 3-methylbutyl ester	-0.0509989	1.48722	0.010246	0.719207	-0.0241497	0.570295	0.0132114	0.867593	0.00514993	0.848393	-0.00312012	0.679128	0.0153228	0.798774
v27	Butanoic acid, butyl ester	0.000252139	1.05526	0.0379717	1.05233	-0.00763169	0.88179	0.00375231	0.32895	0.0152968	1.12939	0.000496314	1.02784	-0.00514333	0.992319
v28	Butanoic acid, ethyl ester	0.0579607	1.11413	0.0237296	0.889139	0.0117836	0.563966	0.031158	1.18348	0.0428755	1.45743	0.00151636	0.743932	-0.0371918	1.12806
v29	Butanoic acid, hexyl ester	-0.045732	1.39558	0.024769	0.637897	0.0209548	0.855081	-0.0092531	0.654289	-0.0565016	1.35544	-0.00739958	0.950423	-0.0289015	1.08095
v30	Butanoic acid, methyl ester	0.00788826	0.495706	0.0233088	0.310124	0.0229826	1.39909	0.061125	0.825102	0.00929883	1.14167	0.0639157	1.53007	-0.000739793	1.07245
v31	Butanoic acid, octyl ester	-0.0520762	1.47626	-0.0054295	1.32545	-0.0337382	1.22816	-0.0609486	1.10999	-0.00553889	0.896907	-0.00283978	1.01779	-0.00396615	0.869123
v32	Butanoic acid, propyl ester	0.00861889	0.544198	0.0522568	1.14481	0.0340163	1.13265	0.0454244	1.52689	0.0164507	0.950263	-0.0143191	1.08506	-0.00474869	0.769549
v33	Carbon disulfide	-0.0546088	0.875866	-0.041995	1.011	-0.00121506	0.890283	-0.0107294	0.838315	0.0169484	0.75584	0.105318	1.74967	-0.0319067	1.12643
v34	(Z)-Linalool oxide	-0.0658789	0.858768	0.060002	1.31194	0.0277715	1.62042	0.0691161	1.19139	0.0407328	1.06552	0.0505957	0.886954	0.0660386	1.469
v35	Disulfide, dimethyl	-0.0642392	0.846992	0.0166544	0.387935	-0.0251406	0.949847	-0.0391016	0.905355	-0.00315433	0.367787	#N/A	#N/A	#N/A	#N/A
v36	D-Limonene	-0.0144455	0.564102	0.0535658	1.06002	0.011818	0.495569	-0.0401069	0.726511	0.0306231	0.925609	-0.0715397	1.26967	0.00168449	0.368181
v37	Acetic acid, ethyl ester	-0.0107454	0.176535	-0.0511461	1.16484	0.00708872	0.281306	-0.0041124	1.28405	0.00500431	0.690412	-0.000125378	0.472903	-0.0335168	1.21392
v38	Furan, 2-methyl-	-0.0538769	1.34281	-0.0657607	1.02148	-0.0318491	0.767462	-0.0551834	1.12036	-0.0541286	1.5143	#N/A	#N/A	#N/A	#N/A
v39	Hexanal	-0.0157145	1.00775	-0.0545627	0.815509	-0.0504146	1.0599	-0.0205785	0.521247	0.00992055	1.01098	-0.0203065	1.08384	-0.0023949	0.402402
v40	Hexanoic acid	0.032888	0.499806	-0.0068156	0.40494	0.00152934	0.906287	-0.0135956	1.11728	-0.0108247	0.979539	-0.00459121	0.27384	0.0164893	0.773492
v41	Hexanoic acid, 1-methylethyl ester	0.024653	1.04078	-0.0235703	0.314193	0.0481239	0.857731	-0.0367318	0.770295	-0.0123755	0.938979	0.016548	0.837449	0.00722101	0.895841
v42	Hexanoic acid, ethyl ester	0.0604592	1.02777	-0.024349	1.05514	-0.0185475	0.490874	-0.00531465	0.970011	0.0100373	1.00671	-0.00874591	0.812863	-0.0213868	0.803625
v43	Hexanoic acid, hexyl ester	-0.0359014	1.41101	0.0170452	0.964817	-0.00252324	0.802231	-0.0283621	0.754175	-0.0477183	1.19688	0.00942603	0.897815	-0.00775694	0.838882
v44	Hexanoic acid, methyl ester	-0.00514677	0.518552	-0.0214689	0.534211	-0.00721293	0.93878	-0.000881968	0.486014	0.00869532	1.03768	0.0284761	1.10998	0.0140959	1.04758
v45	Hexanoic acid, octyl ester	-0.0376672	1.49932	-0.025102	1.40001	-0.0305682	0.97666	-0.0326934	0.57039	-0.00106636	0.994359	0.00709347	1.01285	0.000409565	0.71333
v46	Hexanoic acid, propyl ester	-0.0376148	0.97901	-0.00934838	0.527448	0.0305182	0.575418	0.00315178	1.25866	-0.0207216	0.849776	-0.0148285	1.03266	-0.010252	0.617141
v47	Acetic acid, 1-methylethyl ester	-0.0220336	0.341619	0.00448186	0.787103	0.0484011	1.05153	-0.0628516	0.842005	-0.0236524	0.671398	0.0665057	1.34508	-0.0112408	0.69102
v48	Butanoic acid, 1-methylethyl ester	0.0387456	1.01313	-0.0171478	0.352405	0.0537197	1.04098	-0.00312761	0.487017	-0.0148968	0.937238	0.0576165	1.23734	-0.012653	1.06054
v49	Linalool	-0.064849	1.215	-0.0575225	0.845302	0.0736879	1.79171	0.0328091	0.599098	0.0153449	0.458146	-0.00116057	0.292874	-0.000379175	0.374262
v50	Methanethiol	0.000241522	1.0551	0.023207	0.451054	-0.0187767	0.755401	-0.134841	1.80316	-0.00805497	0.259919	0.0737026	1.08484	0.0502996	1.20284
v51	2-Pentanone, 4-methyl-	-0.0218812	0.982528	0.0283682	0.490509	-0.0277147	0.603938	0.017525	0.30222	-0.052583	1.06038	0.000197835	0.643273	-0.0457322	1.15111
v52	Butanoic acid, 3-methyl-, methyl ester	-0.0190919	0.653087	0.0133135	0.964104	0.00424073	0.75968	0.0344621	1.24819	0.0375784	1.35938	0.00192427	0.435896	-0.0331878	0.993517
v53	Acetic acid, thio-, S-methyl ester	0.027661	0.886965	-0.0112754	0.318067	-0.0409887	1.00973	-0.0271491	1.03816	0.0188801	0.47039	0.0407123	0.611899	0.0219589	0.750068
v54	Pentanoic acid, methyl ester	0.0731407	1.09139	0.101799	1.29553	-0.00638957	1.0185	0.0318921	0.801176	0.024406	0.955526	0.0472065	1.25749	0.0167687	1.16256
v55	Myrtenyl acetate	-0.0521085	0.639831	-0.0108477	0.525824	0.0349823	0.781747	0.0166174	0.820339	-0.0829959	1.85199	#N/A	#N/A	#N/A	#N/A
v56	Nonanal	-0.069647	1.34445	-0.093558	1.17262	-0.0458085	1.4744	-0.0348962	0.817079	-0.0106788	0.965599	-0.0642721	1.50651	0.0348827	0.833672
v57	Acetic acid, propyl ester	-0.00370037	0.609871	0.0719146	1.38515	0.0188903	1.2873	0.00140645	0.904189	-0.0101559	0.578683	-0.0228647	0.48444	-0.0056338	0.946493
v58	Octanoic acid, ethyl ester	0.0540604	1.04374	-0.0112406	1.27353	-0.0248727	0.723906	-0.0172043	0.928534	-0.00112119	0.864656	-0.0371672	0.831233	-0.0278788	0.892329
v59	Octanoic acid, methyl ester	0.0197769	0.682728	-0.058502	0.924568	-0.0279505	0.659573	-0.0232633	0.811283	0.00339071	1.00118	-0.042325	0.861194	0.00229172	0.938333
v60	Pentanal	-0.0136935	0.926913	-0.00995518	0.129416	-0.0111999	0.547641	0.0632178	1.64874	-0.00791741	1.04036	-0.0405407	1.41481	0.0193056	1.3327
v61	Pentanoic acid, ethyl ester	0.0012075	0.486522	0.0581423	1.11907	-0.00697268	0.190423	0.0401961	1.16075	0.052701	1.20305	0.0141554	0.445198	-0.00421936	0.591356
v62	Propanoic acid, ethyl ester	-0.0292305	0.579239	0.0883427	1.21324	0.0175525	0.825061	-0.0268832	1.39126	0.0150151	0.553245	-0.0325487	0.842527	-0.032939	1.1574
v63	2-Hexen-1-ol, (E)-	0.034415	0.421441	0.0126465	0.737149	0.00369712	0.0734093	0.0462325	1.31263	-0.0187097	0.953726	0.051076	0.994288	-0.0215241	1.1538
v64	Butanoic acid	0.0533223	1.07051	-0.0388289	0.753239	0.0114069	0.938122	-0.0192995	1.175	-0.0113032	1.12469	-0.00607672	0.309218	0.0233194	0.932132
v65	Butanoic acid, 2-methyl-	-0.0386932	1.39433	-0.0636537	1.19672	-0.00589866	0.855198	0.0245042	0.381273	0.019681	1.0731	-0.0138009	0.670826	0.0200468	0.927157
v66	Butanoic acid, 2-methyl-, ethyl ester	-0.0590327	0.906715	-0.0642258	1.06662	-0.0155444	1.04498	0.0336829	1.16986	-0.0254691	0.664555	-0.08692	1.35571	-0.0353103	1.07148
v67	Butanoic acid, 2-methyl-, methyl ester	0.0533464	1.0261	0.000412444	0.362199	-0.0293742	1.23591	0.0334845	0.448587	-0.0258275	0.88874	0.018197	1.17285	-0.0193312	0.872433
v68	Butanoic acid, 3-methyl-	-0.0201403	0.476514	0.0382464	1.22805	-0.0222176	0.577508	-0.000290514	0.857358	-0.0314946	1.07468	0.0435158	0.952931	-0.0341047	0.917218
v69	delta-Decalactone											0.0298313	1.00545	0.00519142	0.809798
v70	Furaneol											-0.01815	1.08776	-0.0175922	1.00733
v71	Furan, 3-methyl-											0.0154151	1.15414	0.0286203	1.34369
R2			97.24		77.65		85.31		92.59	1.323
RMSEP			0.5515		0.7177		0.8241		1.037	64.47

## Sheet: Mean_Astringent
		2009		2010		2015		2016		2017		2018		2019
		Coef	VIM	Coef	VIM	Coef	VIM	Coef	VIM	Coef	VIM	Coef	VIM	Coef	VIM
SSC		-0.0333508	1.45455	0.0460158	1.08719	-0.0278508	1.10334	0.00712496	0.133626	-0.0162452	0.71875	0.0122344	0.778129	-0.0620828	1.13255
TA		0.0323059	1.14457	0.0929141	2.16367	-0.0103732	0.836148	0.0541572	1.50726	0.0324989	0.769338	0.0599012	1.37256	-0.0239028	0.62335
SSC/TA		-0.0401497	1.80365	-0.0401328	1.00046	-0.0261236	0.766012	-0.0442762	1.24085	-0.0558727	1.34066	-0.0382724	1.26091	-0.074279	1.28495
Mean_Firm				-0.0682581	1.23684	-0.0296191	1.80265	-0.0509878	1.16087	0.0129617	0.467213	-0.026686	0.919068	-0.0193252	0.366217
v1	alpha-Terpineol	-0.0146788	1.23831	0.00166311	1.32252	0.0355034	1.11028	0.0163264	1.59993	-0.00345876	0.731788	-0.0303338	1.08135	-0.0266736	1.25154
v2	beta-Myrcene	-0.0251588	0.587913	-0.0138322	1.22606	-0.0217767	0.921602	-0.0168132	0.933359	0.0291397	0.919721	-0.0279956	1.44187	-0.0185902	1.42587
v3	gamma-Dodecalactone	-0.0262266	1.0571	-0.0513265	1.37687	-0.0199921	1.25324	0.053163	1.7064	0.0269106	0.763098	-0.0254812	1.12384	-0.00148175	0.94053
v4	Nerolidol	-0.0443659	1.22524	0.0155975	1.02933	-0.0150107	0.804041	0.0120759	1.27931	-0.00259879	0.756627	-0.0172517	0.854155	0.0242486	0.599293
v5	Acetic acid, 3-methylbutyl ester	-0.0307404	0.717469	0.0240227	0.701684	-0.00678179	0.383385	-0.0321422	0.802098	-0.0503681	1.50841	0.0193267	1.35368	0.00900875	0.582006
v6	gamma-Decalactone	-0.0043447	1.02948	-0.00473969	0.858672	0.0214736	0.83774	0.0456924	1.46974	0.0239202	0.81232	0.00151696	0.892101	0.0531925	1.28351
v7	2,3-Butanedione	-0.00485358	1.01895	-0.0162923	0.323392	0.00999148	0.489789	-0.0672507	1.36621	0.0014857	0.903057	-0.00314448	0.779786	0.0293954	1.13287
v8	2-Butanone	-0.0299445	1.37383	0.0216561	1.12713	0.00054956	0.431262	0.000125765	0.34806	-0.00503771	0.673786	0.00143701	0.870458	0.0415929	1.39529
v9	2-Heptanone	-0.0157499	1.16274	-0.0303705	0.751083	-0.00558959	1.07382	0.0620251	1.20663	-0.0243702	1.24584	0.0240798	0.794389	0.0193562	1.45834
v10	Acetic acid, (Z)-2-hexenyl ester	-0.00449368	0.666988	0.0398089	1.16976	0.0321575	1.50648	0.0388636	0.670158	0.00636851	0.911928	-0.0047197	0.7758	0.0248962	0.936771
v11	2-Hexenal, (E)-	-0.0307548	1.1422	-0.051987	1.22697	-0.0499608	1.15134	-0.0443652	0.92128	-0.000874049	0.970519	0.0290195	0.930047	-0.0348475	0.914482
v12	2-Pentenal, (E)-	-0.0175275	0.964814	0.0423203	0.825017	-0.0685194	1.43053	-0.0640493	1.37092	0.0161815	0.919682	0.017474	0.599545	-0.00722404	0.860822
v13	Mesifuran	0.00812081	0.772152	-0.0575752	1.1728	0.0316319	0.657407	-0.0586129	1.70826	-0.03356	1.10868	0.0350621	1.26444	0.0433246	0.9614
v14	5-Hepten-2-one, 6-methyl-	-0.0310543	1.56929	0.00496442	0.962315	-0.00979003	0.509943	-0.00496146	1.26347	0.00651415	0.564194	0.033313	0.761782	0.0434907	0.782196
v15	Acetic acid, 2-phenylethyl ester	-0.0531342	1.29464	-0.0182594	0.555218	-0.0221948	1.26871	0.00936907	1.06471	-0.00874127	0.589554	0.0131939	0.891727	0.0382789	0.686728
v16	Acetic acid, butyl ester	-0.0127206	0.409471	0.0116533	0.203054	0.0534395	1.45613	-0.0105844	0.861113	0.00431588	0.691376	0.0128252	0.794777	0.0324438	0.843803
v17	Acetic acid, hexyl ester	-0.0176874	0.42649	-0.0041012	0.39386	0.0299963	0.866112	0.0574027	1.00561	-0.00251941	0.91194	0.0141537	0.939061	0.0486185	1.05684
v18	Acetic acid, methyl ester	0.0145409	0.880537	-0.00959994	0.528685	0.0114172	0.319544	-0.0294817	0.910129	-0.0146702	1.17349	0.0296856	0.961224	0.0291939	0.657079
v19	Acetic acid, nonyl ester	-0.00905875	0.703056	0.0166537	0.301542	0.0712297	1.74708	0.00720641	0.495283	0.0455631	1.13346	-0.0406593	1.13114	0.0780963	1.57506
v20	Acetic acid, octyl ester	-0.026493	0.749982	-0.0355236	0.921866	-0.0114022	0.493016	-0.0293651	0.879928	-0.0288817	0.930627	0.0152004	0.88652	0.0264007	0.79392
v21	Acetic acid, pentyl ester	0.00263126	0.468733	-0.0123163	0.566216	0.0193793	0.708166	-0.0113356	0.596539	0.0278498	1.04189	-0.00597634	0.999595	0.00526666	0.75867
v22	Acetic acid, phenylmethyl ester	-0.0411739	0.963116	-0.0210977	0.791464	-0.0385999	1.30306	0.0667704	1.1936	0.0251083	0.621692	-0.0116197	0.764857	-0.0845563	1.45558
v23	Benzaldehyde	-0.0479111	1.56099	0.0224722	1.26834	-0.010307	0.747838	0.0133651	0.48519	-0.000640783	0.529481	-0.00770884	0.996626	0.00930351	0.628704
v24	Butanethioic acid, S-methyl ester	0.0143627	0.296904	0.0211577	0.956518	-0.0222386	1.2412	-0.057017	1.42786	-0.0212303	0.878177	-0.00233189	0.576219	0.00227485	0.655029
v25	Butanoic acid, 3-methyl-, ethyl ester	0.0284633	0.587348	-0.0201863	0.663459	-0.0299724	0.769266	-0.0102357	0.688148	-0.0270824	1.07367	0.0542048	1.5372	-0.0386533	0.671785
v26	Butanoic acid, 3-methylbutyl ester	0.0164629	1.0935	0.0376188	0.86622	-0.0291085	0.653772	0.00302285	0.602562	-0.0341027	0.906519	0.0273364	1.16772	-0.00314772	0.925074
v27	Butanoic acid, butyl ester	0.0121681	0.967184	0.0441384	0.706373	-0.0030901	0.125052	0.0250986	0.493342	-0.00673392	0.894691	0.0277301	1.0636	0.00131739	0.906209
v28	Butanoic acid, ethyl ester	0.0382475	1.27514	0.0394782	0.739524	0.015419	0.685171	0.0116886	0.758027	0.0339348	1.13972	-0.00412522	0.632647	-0.00225081	0.487842
v29	Butanoic acid, hexyl ester	0.00153287	1.16795	0.0199596	0.847004	0.0107165	0.420426	0.00151355	1.01307	-0.0492238	1.3517	0.0080381	0.891518	-0.00287505	0.822087
v30	Butanoic acid, methyl ester	0.00540669	0.414843	0.010787	0.570691	0.0277192	0.629972	0.0369185	0.988853	-0.0235396	1.11393	0.0236399	0.762351	0.0521942	1.13778
v31	Butanoic acid, octyl ester	-0.0193576	1.31799	0.00911939	0.64937	0.0128489	0.367625	-0.0201254	0.600484	-0.0274354	1.12553	0.0104681	0.92615	-0.00847615	1.01788
v32	Butanoic acid, propyl ester	-0.00241739	0.680845	0.0482652	0.778871	0.0270625	0.698626	0.00648142	0.56037	0.0108077	0.732451	0.00602533	1.01144	-0.0131354	0.995679
v33	Carbon disulfide	-0.012128	0.886258	-0.0158363	0.363909	0.0321544	1.07518	0.0143696	0.785075	0.0278815	1.0259	0.0406479	1.18796	0.0459336	1.06515
v34	(Z)-Linalool oxide	-0.0475856	1.29993	0.0712683	1.66848	-0.00244282	0.237247	0.0556082	1.33538	0.0466543	1.10943	-0.00526615	0.670309	0.0853167	1.75165
v35	Disulfide, dimethyl	-0.0142997	0.618457	0.00729723	1.05554	-0.00608364	0.771168	-0.0312107	0.693276	-0.0234944	0.768084	#N/A	#N/A	#N/A	#N/A
v36	D-Limonene	-0.0117093	0.355835	0.0604859	1.33399	-0.0247052	1.2299	-0.0792615	1.573	0.032765	1.07047	-0.0516617	1.28991	0.00758174	1.47913
v37	Acetic acid, ethyl ester	0.00417454	0.594528	-0.0265208	0.803523	-0.0133881	0.874357	-0.0149752	0.746307	0.0319829	1.21067	-0.0049453	0.434316	-0.0284411	0.881397
v38	Furan, 2-methyl-	-0.0177832	1.40152	-0.0356085	0.787815	-0.00924907	0.547011	0.00782831	0.204895	-0.0533813	1.47493	#N/A	#N/A	#N/A	#N/A
v39	Hexanal	-0.0249464	1.27461	-0.104189	1.7685	-0.0160266	0.372586	-0.0269998	1.05019	0.00941779	0.61346	0.00380574	0.728501	0.0377515	0.845166
v40	Hexanoic acid	-0.0179047	0.393654	-0.0179552	0.406526	-0.0161755	1.01913	0.0142896	0.515198	-0.000480144	1.02498	0.00125237	0.4433	0.00665497	0.833079
v41	Hexanoic acid, 1-methylethyl ester	0.00412307	0.906358	0.00520007	0.48603	0.0167844	1.05965	-0.0353172	0.617667	-0.0222805	1.17231	0.0328927	0.957377	-0.0250128	1.08759
v42	Hexanoic acid, ethyl ester	0.0228938	0.95142	-0.0125481	0.774611	-0.0375302	1.47231	-0.0131722	0.742571	0.0301771	1.2836	-0.00569154	0.774902	-0.0184281	0.421484
v43	Hexanoic acid, hexyl ester	-0.00872783	1.20639	-0.00689013	0.704621	-0.00714916	0.822183	-0.0106655	0.57475	-0.0318983	1.15816	0.0120238	0.886255	-0.0320061	1.1254
v44	Hexanoic acid, methyl ester	-0.0282366	0.832807	-0.0234144	0.728125	-0.0109536	0.989084	-0.0194359	0.572943	-0.0121254	1.18934	0.0111617	0.607738	0.0135537	0.959846
v45	Hexanoic acid, octyl ester	-0.0296994	1.32867	0.000885406	0.585604	-0.0197212	0.96816	-0.000882105	0.675537	-0.015925	1.0714	0.0140472	0.949568	-0.0192846	1.05825
v46	Hexanoic acid, propyl ester	-0.037969	1.45588	0.0575099	1.36008	-0.0102423	1.31526	-0.00646997	1.12987	-0.00546175	0.70445	0.0012451	0.938825	-0.0352143	0.892268
v47	Acetic acid, 1-methylethyl ester	0.0496094	1.18478	0.0194771	0.716925	0.0304156	0.708812	-0.0438774	1.21894	-0.0320579	1.13482	0.0485876	1.39791	-0.0148118	0.808621
v48	Butanoic acid, 1-methylethyl ester	0.0269321	0.990467	0.0182693	0.945735	0.0681973	1.68867	0.00232719	0.395031	-0.030277	1.22294	0.02496	1.13202	-0.00335467	0.894447
v49	Linalool	-0.0273362	0.965077	-0.0127507	1.17481	0.0243635	0.655133	0.045306	1.4736	0.0132515	0.773458	-0.0223108	1.49327	-0.0056684	1.25204
v50	Methanethiol	0.0486858	1.79538	-0.0139075	1.09725	0.0333896	0.745003	-0.067909	1.41674	-0.0266912	1.0521	0.0293874	1.06363	0.0514489	1.08111
v51	2-Pentanone, 4-methyl-	0.00296985	0.606813	0.0235041	0.495733	-0.0273485	0.607511	0.00689943	0.581838	-0.0790705	2.02426	0.0460018	1.33922	0.0193838	0.815449
v52	Butanoic acid, 3-methyl-, methyl ester	0.0198463	0.437824	-0.00562036	0.576336	-0.00899338	0.580311	0.0122418	0.849179	0.0338293	1.14065	0.000644771	1.3213	0.0149222	0.661945
v53	Acetic acid, thio-, S-methyl ester	0.0133596	0.396482	-0.0275137	1.26354	-0.0264722	1.27839	-0.0441238	0.888385	-0.00913315	0.676624	0.0108191	0.70653	0.0100983	0.502806
v54	Pentanoic acid, methyl ester	0.00568137	0.225783	0.0645342	1.1185	0.0115342	0.540827	-0.0131302	1.26113	0.00978496	0.967135	0.00201586	0.556161	0.0143567	0.881817
v55	Myrtenyl acetate	-0.039977	0.842206	0.0191571	0.599119	0.0430264	1.57166	0.00809769	1.66678	-0.0497137	1.16779	#N/A	#N/A	#N/A	#N/A
v56	Nonanal	-0.0452374	1.5044	-0.108822	1.9661	-0.00724804	0.842422	-0.0376557	0.923775	-0.00742288	0.320079	-0.0366715	1.10382	-0.0615686	1.6752
v57	Acetic acid, propyl ester	-0.0315942	0.768014	0.0445189	0.88007	0.00473981	0.36046	0.0396254	0.657308	0.00831977	1.09817	-0.0438475	0.977059	0.013021	0.91468
v58	Octanoic acid, ethyl ester	0.00393722	0.814951	-0.00482715	0.671331	-0.0379172	1.40757	-0.0244296	0.516803	0.0226039	1.14038	-0.0252589	0.871237	-0.0197728	0.675402
v59	Octanoic acid, methyl ester	-0.0198163	0.839484	-0.0354906	0.957707	-0.0163191	1.06019	-0.0230785	0.664554	-0.00606063	1.20885	-0.0347812	0.992796	-0.00286423	1.00531
v60	Pentanal	-0.020669	1.2475	0.0472921	1.14094	0.0126193	1.40267	0.0704118	1.50757	0.00838067	0.940086	-0.000997833	0.586072	0.0137046	1.01533
v61	Pentanoic acid, ethyl ester	-0.018279	0.91875	0.0828469	1.37486	-0.00416344	1.03411	-0.0208805	0.637722	0.0233878	0.847176	-0.00911637	0.309572	-0.0230714	0.78589
v62	Propanoic acid, ethyl ester	0.0145547	0.479329	0.0283086	0.676405	-0.0126339	0.797593	-0.0327031	0.777177	0.0255463	1.09924	-0.0076136	0.727973	-0.00408846	0.771175
v63	2-Hexen-1-ol, (E)-	0.00184916	0.184088	0.0695013	1.72125	0.0712945	2.41774	0.00229297	0.242044	-0.013751	0.48332	0.0401704	1.02309	-0.0357742	1.04686
v64	Butanoic acid	0.033485	0.792047	0.0183723	0.604792	0.0148768	0.415882	0.0169916	0.774115	-0.0056035	0.840614	0.00151041	0.18706	0.0331082	0.89348
v65	Butanoic acid, 2-methyl-	-0.00501151	1.11988	-0.0620926	1.19104	-0.0294831	0.983584	0.0270118	1.08175	0.00703436	1.0546	-0.00578975	0.8654	0.0390403	1.0026
v66	Butanoic acid, 2-methyl-, ethyl ester	-0.0363056	0.839926	-0.0665121	1.42909	-0.0115532	0.494629	-0.00160113	0.433087	-0.00208883	0.671134	-0.0366922	0.81921	0.0141474	0.844699
v67	Butanoic acid, 2-methyl-, methyl ester	-0.0109604	0.701416	0.000832342	0.395289	0.0259319	0.627954	0.0024426	1.05307	-0.027616	0.841417	0.0173758	0.966989	-0.000527154	0.481127
v68	Butanoic acid, 3-methyl-	0.00712668	0.197396	0.0104577	0.255846	-0.0305121	0.672286	0.0146545	0.834183	-0.031013	0.719694	0.0743633	1.95431	-0.0367799	1.05139
v69	delta-Decalactone											0.0211705	0.915858	0.00701892	0.87337
v70	Furaneol											0.0292494	1.27803	0.00308978	0.906312
v71	Furan, 3-methyl-											0.0264652	0.986339	0.0885639	1.81421
R2		95.85		81.12		93.8		88.91		79.63
RMSEP		0.2959		0.5817		0.4255		0.7389		0.4108

## Sheet: Mean_Strawberry
		2009		2010		2015		2016		2017		2018		2019
		Coef	VIM	Coef	VIM	Coef	VIM	Coef	VIM	Coef	VIM	Coef	VIM	Coef	VIM
SSC		-0.026459	0.897738	0.126782	1.87211	0.14085	2.45008	0.109806	2.20746	0.10988	2.26946	0.0936666	2.36326	0.15734	2.26263
TA		-0.0724505	1.2247	0.0508335	0.610087			0.0654669	1.04105	0.0561224	1.74668	0.0944122	1.94951	0.100362	1.58454
SSC/TA		0.02509	1.34548	0.0493444	1.26313			0.0762842	1.71441	0.0546914	1.01962	-0.00296351	0.639401	0.133577	1.70033
Mean_Firm				0.0765621	0.97879	-0.048736	0.752953	-0.142948	2.15404	-0.0108813	0.496968	-0.00101086	1.17927	0.0419276	0.624426
v1	alpha-Terpineol	0.00159548	1.10943	-0.0439035	0.948525	-0.0247992	0.779925	-0.00714136	0.377427	-0.00880889	1.02409	-0.0433811	0.786264	0.0224494	0.328358
v2	beta-Myrcene	0.0744881	1.26858	0.0216472	0.822588	-0.0845824	1.51077	0.0259106	0.834627	0.00680663	0.550887	-0.0399978	0.873656	0.0114547	0.255427
v3	gamma-Dodecalactone	0.0992877	1.43347	-0.0365568	1.07503	0.0266182	1.0175	-0.0468055	0.634458	-0.0148511	1.05326	0.0124469	0.721148	0.00722498	0.709795
v4	Nerolidol	0.0103975	0.320341	-0.0197453	0.681623	-0.0172108	0.797922	0.00588215	0.175999	-0.0468699	1.1415	-0.0231401	0.740556	-0.0769547	1.132
v5	Acetic acid, 3-methylbutyl ester	0.104998	1.1701	-0.0216844	1.04885	-0.0536913	1.05494	-0.00254201	0.641709	0.0631942	1.63674	-0.0288155	0.581098	-0.050091	0.718991
v6	gamma-Decalactone	0.00366306	1.15935	-0.015004	0.901282	0.00207798	1.05987	-0.0465037	0.608453	0.0114707	0.908087	-0.00641409	0.547713	-0.00163359	0.803811
v7	2,3-Butanedione	0.070789	1.36316	-0.0358631	0.688834	-0.00676667	0.719873	-0.0548014	0.776773	-0.0624214	1.63526	0.00475338	0.513988	-0.0345844	0.715455
v8	2-Butanone	0.110857	1.74362	-0.0239028	0.605276	0.0393095	0.916107	-0.0402051	0.710358	-0.0397111	1.65738	-0.000984774	0.659821	0.0522599	1.22152
v9	2-Heptanone	0.0126202	1.16988	0.0268857	1.12629	0.0426943	1.32686	-0.0114489	0.574943	0.0119466	0.666573	-0.0122784	0.375624	-0.0266846	0.673243
v10	Acetic acid, (Z)-2-hexenyl ester	-0.0113772	0.943757	-0.044861	0.991595	0.0103299	0.752598	-0.0692022	1.92467	0.0103052	0.475923	-0.01236	0.502312	-0.0206109	0.730431
v11	2-Hexenal, (E)-	-0.123809	1.38702	-0.0398115	1.33804	-0.00501335	0.733946	0.0702855	1.48488	0.0128721	0.627161	-0.00551924	0.667681	0.00875072	0.898112
v12	2-Pentenal, (E)-	0.0297209	0.650838	0.0573291	0.878529	0.000519539	0.162536	0.0862833	1.29263	0.0318712	0.994032	0.027543	1.49748	0.0125598	1.22895
v13	Mesifuran	0.0117911	0.94232	0.0896647	1.60094	0.00770935	0.311379	0.0579009	1.24818	-0.00457233	0.545263	-0.0134002	0.705116	-0.018954	0.580257
v14	5-Hepten-2-one, 6-methyl-	0.0632484	1.31092	0.0517743	1.17037	0.0281504	1.06958	0.0203647	0.627209	-0.0316041	1.00929	-0.0246712	0.662492	-0.109676	1.2687
v15	Acetic acid, 2-phenylethyl ester	0.0465769	0.861673	0.0140434	0.820258	-0.037922	0.79167	-0.0242105	0.880626	-0.0152273	1.21312	-0.00157036	0.548125	-0.0122388	0.316916
v16	Acetic acid, butyl ester	0.0128235	0.31367	-0.0467904	0.87044	-0.00445312	1.14256	-0.0631991	0.950729	-0.0294284	0.759784	0.00380484	0.491986	-0.0491329	0.969371
v17	Acetic acid, hexyl ester	0.0146354	0.177764	-0.00324681	1.16897	0.0175969	1.41848	-0.0705809	1.86872	-0.0148095	0.499428	0.0105754	0.641842	-0.0130223	0.957965
v18	Acetic acid, methyl ester	-0.0114648	0.836925	0.0266597	0.774401	-0.0255136	1.23472	0.092185	1.22413	-0.0122076	1.00936	-0.0430546	1.68647	-0.063968	1.15093
v19	Acetic acid, nonyl ester	0.0767686	0.930599	-0.0111267	0.302338	-0.0407611	0.710944	0.0195952	0.479443	0.0129164	0.445309	0.0195656	0.604168	-0.0459264	1.10668
v20	Acetic acid, octyl ester	0.0382083	0.606861	0.00101615	0.908237	0.0280284	1.27049	-0.0448979	0.821747	-0.0583358	1.34937	0.00845891	0.5583	-0.0541608	1.128
v21	Acetic acid, pentyl ester	0.0149437	0.533817	0.068133	1.28256	0.0208323	1.38914	0.0205508	0.69932	-0.0284848	0.607491	-0.0039975	0.578191	-0.00175175	1.32879
v22	Acetic acid, phenylmethyl ester	-0.0722256	0.863191	-0.110724	1.37254	0.0273971	0.543295	0.0253114	0.520385	0.00846396	0.624923	0.0141935	0.679326	0.118	1.49095
v23	Benzaldehyde	0.0173264	0.844339	-0.0344842	0.769837	0.0648226	1.5911	0.0615251	0.909287	0.0427871	1.05779	0.0401937	1.41942	0.0837361	1.47199
v24	Butanethioic acid, S-methyl ester	0.0660333	0.711878	0.0494237	1.18627	-0.0166753	0.339077	0.0198162	0.830487	0.0298715	0.800471	-0.0483098	1.59461	0.0138371	0.742448
v25	Butanoic acid, 3-methyl-, ethyl ester	-0.0757251	1.12237	-0.00193992	0.713134	-0.0249274	0.465087	0.0205286	0.717825	0.0650252	1.6438	-0.0155161	0.557161	0.0837399	1.14201
v26	Butanoic acid, 3-methylbutyl ester	0.0293422	1.19482	0.13258	1.87437	-0.039402	0.590511	0.023317	0.686885	0.0285333	1.44195	-0.0282176	0.789649	-0.0180683	0.82901
v27	Butanoic acid, butyl ester	-0.0238819	1.07585	0.0248599	1.14469	-0.00945945	0.816724	0.0112966	0.713499	-0.0057785	0.623969	-0.0245605	0.640084	0.0232057	0.803558
v28	Butanoic acid, ethyl ester	-0.0275204	0.777058	-0.0116467	0.714423	0.0208622	1.13148	-0.00445595	0.811756	0.00330359	0.265953	-0.00157503	0.383821	0.0462904	1.06967
v29	Butanoic acid, hexyl ester	0.00241998	1.18151	0.0279904	1.27234	-0.0210657	0.98776	-0.0158014	0.539966	0.0609918	1.20788	-0.019891	0.579903	0.0401859	0.812815
v30	Butanoic acid, methyl ester	0.0716368	0.843845	0.0345853	1.03421	-0.00513259	0.42327	0.0287947	0.781563	0.0308978	0.836972	-0.0275429	1.25529	-0.0214374	1.13961
v31	Butanoic acid, octyl ester	-0.0180912	1.13487	0.0743301	1.62405	0.0317663	1.25262	-0.0202394	0.508306	-0.0252258	0.888575	0.00839698	0.622537	0.00724547	0.789144
v32	Butanoic acid, propyl ester	0.0617278	0.877467	-0.0191942	0.914753	0.0136109	0.925275	-0.0145783	1.20578	-0.00308542	0.354498	-0.00622215	0.620955	0.0131176	0.74479
v33	Carbon disulfide	0.0846065	1.18042	0.020653	0.586723	0.0433763	1.2065	0.0376589	1.2499	-0.0494747	0.985047	-0.0264393	1.15971	-0.0164729	0.768082
v34	(Z)-Linalool oxide	0.0410374	0.761941	0.0698963	0.982258	-0.0175913	0.624874	0.0183319	0.303819	0.0366767	0.913127	0.0363523	0.71194	-0.0476011	0.694307
v35	Disulfide, dimethyl	0.10528	1.20929	-0.0413899	0.974636	-0.0314011	0.815083	0.020768	1.16893	0.0132994	0.887666	#N/A	#N/A	#N/A	#N/A
v36	D-Limonene	0.066908	1.31466	0.0817845	0.780156	-0.0689812	1.22993	0.0326034	0.567426	0.0269007	0.52432	-0.0115321	0.547855	0.027411	0.61296
v37	Acetic acid, ethyl ester	-0.0392847	0.458389	0.0246282	0.586995	0.00610161	0.869375	0.0572511	1.26623	-0.0372771	1.11491	-0.0232159	1.11069	0.0177944	1.21431
v38	Furan, 2-methyl-	0.0646288	1.24572	-0.0324686	0.883934	0.00601379	0.459518	0.0321287	0.643999	0.0525857	0.932017	#N/A	#N/A	#N/A	#N/A
v39	Hexanal	-0.0525492	1.27198	-0.0727744	1.19133	-0.0689977	1.63661	0.0201743	0.771678	0.0224652	0.637261	-0.0194069	0.715166	-0.0426818	0.581082
v40	Hexanoic acid	0.0232952	0.408981	-0.0105947	0.58176	-0.00480226	1.07397	0.0105461	0.993782	0.0265183	0.770818	0.0263995	0.80467	0.0243609	0.809756
v41	Hexanoic acid, 1-methylethyl ester	0.0112996	1.00321	-0.0313375	0.448862	0.0382872	1.10107	-0.0029422	0.347077	0.00790194	0.732338	0.00206556	0.758369	0.037587	0.890644
v42	Hexanoic acid, ethyl ester	-0.02653	0.801456	-0.0179529	0.528188	0.0156214	1.27657	-0.0109053	0.883246	-0.0312273	0.747844	0.0291422	0.745913	0.00740656	1.01487
v43	Hexanoic acid, hexyl ester	0.00913896	1.19755	0.019361	1.36326	-0.00819259	1.08666	-0.0180384	0.569146	0.0554437	1.08581	-0.0211879	0.581938	0.0579925	0.962808
v44	Hexanoic acid, methyl ester	0.0867833	1.05226	-0.0130461	0.454601	0.00958182	0.799272	0.0174968	0.50166	-0.00449958	0.657909	-0.022206	1.27594	-0.0410331	1.14427
v45	Hexanoic acid, octyl ester	0.00544186	1.06944	0.0747771	1.47346	0.0286119	1.1801	-0.0310318	0.418799	-0.0278797	0.974792	-0.001112	0.547143	-0.00364483	0.722978
v46	Hexanoic acid, propyl ester	0.029816	0.881776	0.103747	1.17044	0.00339098	1.19112	0.00565015	1.03342	-0.0379752	0.802926	0.0384409	0.992584	0.00976162	0.886822
v47	Acetic acid, 1-methylethyl ester	-0.0144031	0.451449	0.0346134	0.663744	-0.0176164	1.04236	0.0376071	0.698277	-0.0511651	1.70712	-0.0571577	1.82042	-0.0549123	1.22517
v48	Butanoic acid, 1-methylethyl ester	0.00827854	0.995724	0.043758	1.35516	-0.0102275	0.170848	0.0239825	0.635633	0.0103006	0.730028	-0.0259421	0.728809	0.0255975	0.962042
v49	Linalool	0.0647306	0.828411	-0.0437233	0.998289	-0.0312916	0.854788	0.0174005	0.262236	-0.00111131	0.605786	-0.0497467	1.11251	-0.0141205	0.350559
v50	Methanethiol	-0.00715545	0.974918	0.0781166	1.20436	0.0207281	0.40228	-0.0681884	1.21684	-0.0147099	1.17304	-0.0419454	1.3563	-0.0533264	0.989098
v51	2-Pentanone, 4-methyl-	0.068451	1.42044	0.013987	0.494653	-0.0251578	0.369005	0.022448	0.725297	0.0460701	1.3929	-0.0280293	0.79362	0.0223145	0.490163
v52	Butanoic acid, 3-methyl-, methyl ester	0.00768092	1.13571	0.0160762	0.805642	0.00710304	0.746261	-0.00764255	0.83585	0.00607682	0.223641	0.00721874	1.06078	0.01727	0.865329
v53	Acetic acid, thio-, S-methyl ester	0.0624466	0.724122	-0.0283875	1.21283	0.00307397	0.25157	0.0377843	1.05882	0.00889954	0.670283	0.00271833	1.24024	0.00979494	0.637172
v54	Pentanoic acid, methyl ester	0.0124451	0.361336	0.0262868	0.764121	-0.00731143	0.575269	0.0270444	0.729964	0.0120369	0.507636	-0.0331395	0.917971	-0.0220586	1.04686
v55	Myrtenyl acetate	0.0224907	0.458381	0.0412932	0.68628	-0.0412687	0.665943	-0.0495587	1.0858	-0.0193816	0.774696	#N/A	#N/A	#N/A	#N/A
v56	Nonanal	0.0790072	1.39427	-0.0185661	0.548832	0.0900427	1.80068	0.0483569	1.14522	-0.0221752	0.800273	0.0184403	1.25219	0.0106771	0.544368
v57	Acetic acid, propyl ester	0.0129244	0.614998	0.0299816	0.858967	-0.00173511	0.690792	-0.0283842	1.38298	-0.0264069	1.07893	-0.0175762	0.456726	-0.000972856	1.00961
v58	Octanoic acid, ethyl ester	0.0164657	0.889721	0.0121987	0.835468	0.0155114	1.26519	-0.0254909	0.964326	-0.0316987	0.783672	0.0810465	1.63396	0.00705978	0.958404
v59	Octanoic acid, methyl ester	-0.00682089	0.51073	-0.0211992	0.330966	0.00231295	0.95617	-0.00950375	0.623919	-0.0132052	0.781358	-0.0122927	0.801388	-0.0255521	1.00069
v60	Pentanal	-0.00420967	1.0836	0.069858	0.953578	0.0669686	1.10449	-0.00407202	1.20191	-0.0205565	0.572185	0.0478648	1.81509	0.0334387	1.42498
v61	Pentanoic acid, ethyl ester	0.0217209	0.67567	-0.0321036	0.719973	0.00785655	1.14621	-0.0451455	1.19684	-0.0199146	0.598871	0.00357875	0.299793	0.0239337	1.00177
v62	Propanoic acid, ethyl ester	-0.0195266	0.615941	-0.0805027	0.911913	0.0282577	0.889578	0.0136098	1.13826	-0.0182376	1.07916	-0.0446208	1.06338	-0.00995477	1.06065
v63	2-Hexen-1-ol, (E)-	-0.0414687	0.910688	0.0149526	0.6745	-0.0309723	0.559458	-0.0176141	1.39211	0.0292055	0.543245	-0.0273734	0.586789	0.0300824	1.20647
v64	Butanoic acid	-0.0371976	0.637354	-0.0502708	1.36317	-0.0295941	0.970805	0.0131941	0.991116	-0.00223598	0.842031	0.0043129	0.436523	-0.0265427	0.882585
v65	Butanoic acid, 2-methyl-	0.049737	1.28616	0.00545834	0.675274	0.0149442	0.378801	-0.0198411	0.271553	0.00152201	0.948713	-0.0309913	0.673064	-0.0381481	0.983334
v66	Butanoic acid, 2-methyl-, ethyl ester	0.0443655	0.672501	0.0259524	0.37342	-0.00493358	0.734143	-0.0314507	1.33438	-0.0519705	1.54042	-0.0471148	1.51019	-0.0466714	1.02303
v67	Butanoic acid, 2-methyl-, methyl ester	0.110467	1.28674	0.0860706	0.948824	-0.0255344	1.05624	0.0118246	0.37552	0.0116233	1.11877	-0.0419015	1.66403	-0.0501726	1.1728
v68	Butanoic acid, 3-methyl-	0.0501447	1.08619	0.035651	1.06286	-0.0236152	0.375874	0.0238538	1.01215	-0.0166717	1.05155	-0.0333278	1.0043	0.0267613	0.411655
v69	delta-Decalactone											-0.0264191	0.626787	0.00659027	0.894118
v70	Furaneol											-0.00945232	0.629069	-0.04144	0.960402
v71	Furan, 3-methyl-											0.0258826	1.40666	0.00508965	1.3447
R2		94.56		86.31		83.26		93.05		76.82
RMSEP		0.7261		0.6284		0.6629		0.796		0.6546

## Sheet: Mean_Green
		2009		2010		2015		2016		2017		2018		2019
		Coef	VIM	Coef	VIM	Coef	VIM	Coef	VIM	Coef	VIM	Coef	VIM	Coef	VIM
SSC		0.0294911	1.0748	0.0217323	0.957714	-0.0430213	1.30895	-0.0450218	1.34119	-0.0784412	1.61272	-0.0448057	1.68823	-0.024722	1.08678
TA		0.0540151	1.2318	0.0358576	1.18573	0.00298492	0.893316	0.00800585	0.132625	-0.00642194	1.18678	-0.0200918	0.517747	-0.0210875	0.884939
SSC/TA		-0.0101422	1.48613	-0.0076751	0.393365	-0.0534004	1.15093	-0.0700054	1.71274	-0.0720188	1.3834	-0.0205991	1.04017	-0.0118091	0.703283
Mean_Firm				0.0887911	1.62146	0.071543	1.38948	0.0697048	1.36468	0.0577413	1.20589	0.103141	2.32739	0.0304139	0.945598
v1	alpha-Terpineol	0.0185959	1.0105	0.0326655	1.37325	0.0525515	1.33887	-0.00322513	0.558099	-0.0355786	0.655523	-0.0154736	0.730667	0.0255966	1.39563
v2	beta-Myrcene	-0.05814	0.981843	0.0039206	1.18891	-0.0309684	0.681908	-0.0491273	0.852371	-0.0108252	0.367918	-0.00609731	1.11596	0.00945443	1.28409
v3	gamma-Dodecalactone	-0.0454296	1.0225	0.0336936	1.29951	-0.030407	0.869942	0.0666386	1.24716	0.0186284	0.458985	-0.0333526	1.10024	-0.00164446	0.554702
v4	Nerolidol	0.0144056	0.368844	-0.0221175	1.09374	-0.00907556	0.481315	-0.0234564	0.3844	0.0238415	0.721328	-0.00090073	0.640384	0.0265081	0.891307
v5	Acetic acid, 3-methylbutyl ester	-0.0536198	0.920424	0.0248488	0.81116	0.0300798	0.717271	-0.00294118	0.451354	-0.0485264	1.38453	0.0311493	0.985602	0.00984191	0.820356
v6	gamma-Decalactone	-0.00456748	1.0865	-0.0165748	1.07917	0.0383682	1.2371	0.0585634	1.15913	0.0136882	0.545954	-0.0177969	0.803144	0.00618374	0.379015
v7	2,3-Butanedione	-0.033575	1.1478	-0.0230274	0.517283	0.00439667	0.310354	-0.0207162	0.511772	0.0118647	1.16162	0.0137303	0.63349	0.049093	1.79059
v8	2-Butanone	-0.0703997	1.57253	-0.00135422	1.12347	0.0135893	0.728444	0.0543961	0.866109	0.0108229	0.800306	0.0134399	0.7718	0.0136708	1.42526
v9	2-Heptanone	-0.0325618	1.23474	-0.0344691	1.08523	0.0342006	1.13858	0.0521432	1.28351	-0.017198	0.85924	-0.00699993	0.534378	0.0159992	1.1279
v10	Acetic acid, (Z)-2-hexenyl ester	0.0125654	0.755897	-0.00209986	0.964468	0.0291814	0.888638	0.0602384	1.65564	-0.00503281	0.841217	0.00607427	0.674098	0.00302535	0.219676
v11	2-Hexenal, (E)-	0.0771267	1.06038	-0.0678758	1.47316	-0.0185157	0.674929	-0.0536521	1.02377	0.00637098	0.737994	0.0124268	0.524999	-0.00731478	0.311081
v12	2-Pentenal, (E)-	-0.0537706	1.13265	-0.00276388	0.61897	-0.0283334	0.990639	-0.0506614	0.813878	0.0282699	0.966379	0.0137526	0.804302	-0.0120519	0.654075
v13	Mesifuran	0.00385125	0.759729	-0.0317503	1.12355	0.0672003	1.49439	-0.0717073	1.71268	0.000691854	0.676007	0.00215644	0.71058	0.0268587	0.83204
v14	5-Hepten-2-one, 6-methyl-	-0.0221485	1.19111	-0.00375137	1.09041	-0.000374846	0.623035	-0.0339586	0.684481	0.0201167	0.518273	0.0580159	1.3462	0.013254	0.642212
v15	Acetic acid, 2-phenylethyl ester	-0.0556367	0.931491	-0.0293789	0.778605	0.000190481	0.362386	0.0108149	0.880173	0.0189487	0.437438	0.0142099	0.760849	0.00579476	0.543385
v16	Acetic acid, butyl ester	-0.00969893	0.727957	0.0372689	0.703685	-0.0194933	0.84471	0.0880977	1.54874	0.0522313	1.22219	0.0229153	0.730012	0.0422948	1.59387
v17	Acetic acid, hexyl ester	-0.0250782	0.599627	0.0336785	0.805652	0.00588012	0.551782	0.0793883	1.82487	0.0010927	0.305571	0.0101872	0.694169	0.0124659	0.954292
v18	Acetic acid, methyl ester	0.00335909	0.716001	-0.0274516	0.5682	0.0296972	0.926378	-0.0271275	0.492742	-0.0116175	0.340544	0.0226166	1.21472	0.0232046	1.05501
v19	Acetic acid, nonyl ester	-0.0596985	0.807028	0.078269	1.46092	0.092721	1.82721	-0.0332773	0.647722	0.0370702	0.685287	-0.0514474	1.29923	0.0366014	1.38909
v20	Acetic acid, octyl ester	-0.047951	1.07574	0.0124637	0.56209	-0.0531476	1.36199	-0.0147364	0.703286	0.0192774	0.834994	0.00239656	0.642794	0.0388481	1.58832
v21	Acetic acid, pentyl ester	0.00525516	0.29494	-0.000397267	0.704949	-0.0409811	0.936756	-0.0221225	0.587436	0.0746992	1.42507	-0.00354679	0.826406	-0.0135757	1.02091
v22	Acetic acid, phenylmethyl ester	-0.00215007	0.124744	0.0193584	0.820772	0.00886417	0.437143	0.00113122	0.173012	-0.00636609	0.148107	-0.0440824	1.29496	-0.0527683	1.59595
v23	Benzaldehyde	-0.0254712	0.961686	0.019502	1.23022	-0.0373218	0.851491	-0.0775175	1.25082	-0.0364496	0.758683	-0.0172902	1.06026	-0.00902312	0.74327
v24	Butanethioic acid, S-methyl ester	-0.00831547	0.332115	-0.0174937	0.977226	0.00195379	0.252646	-0.0463428	1.45698	-0.0351009	1.27087	0.0114212	0.889524	-0.0203486	0.792044
v25	Butanoic acid, 3-methyl-, ethyl ester	0.0252253	0.468278	-0.0114007	0.638203	0.00554493	0.433765	-0.0177272	0.496258	-0.0241746	1.07552	0.022143	0.740024	-0.00885237	0.658135
v26	Butanoic acid, 3-methylbutyl ester	0.00899451	1.12236	0.018688	0.876356	0.00600405	0.680683	-0.00741557	0.243604	-0.0359547	1.56711	0.00473304	0.725951	0.0105249	0.939721
v27	Butanoic acid, butyl ester	0.0144997	0.980274	0.0335786	0.635404	0.00269843	1.14453	0.001935	0.856558	-0.0118229	0.859338	0.0228517	0.870797	0.0161974	0.814056
v28	Butanoic acid, ethyl ester	0.0249415	1.02808	0.00362663	0.440984	-0.00981776	0.968851	0.00136694	0.582777	0.0216713	0.599662	0.0042842	0.572131	-0.013207	1.13763
v29	Butanoic acid, hexyl ester	0.0103282	1.10919	0.0241844	1.04434	0.0185388	1.20117	-0.00376113	0.88677	-0.0845675	2.01472	0.0306571	0.840186	-0.0201987	0.745489
v30	Butanoic acid, methyl ester	-0.000607152	0.394385	0.0201528	0.585874	-0.00930235	0.343765	0.0138874	0.871479	-0.0214449	1.08542	0.0180039	1.13657	0.00809969	0.686149
v31	Butanoic acid, octyl ester	0.00609403	1.15303	-0.0049113	0.646273	-0.0360965	1.44775	-0.0191489	1.09437	-0.0152674	0.722708	0.0229791	0.78981	0.0156749	1.00025
v32	Butanoic acid, propyl ester	-0.0362997	0.70583	0.0182917	0.409413	0.0293846	0.734074	0.00409334	0.82021	0.00112072	0.681725	0.0129972	1.01256	-0.0146978	1.0112
v33	Carbon disulfide	-0.039437	0.97171	0.0316844	0.652271	0.0360965	0.968773	-0.0284869	0.665973	0.0301485	1.24125	0.0065511	0.917487	0.0147694	0.64778
v34	(Z)-Linalool oxide	-0.0357413	0.961756	0.0383075	1.2096	0.0157235	0.468529	0.0155678	0.664687	0.0230964	0.839033	-0.0585795	1.3723	0.0292207	1.14335
v35	Disulfide, dimethyl	-0.0236481	0.556704	0.0294706	1.33437	0.00546159	0.541499	-0.0496427	1.08945	-0.0165806	0.479563	#N/A	#N/A	#N/A	#N/A
v36	D-Limonene	-0.0460131	1.02789	0.0418851	0.766383	-0.0414593	0.886706	-0.0529345	0.987936	-0.00169277	0.508178	-0.0515065	1.14956	0.0234489	1.56241
v37	Acetic acid, ethyl ester	0.0144937	0.452418	-0.0287469	0.855939	0.00290619	0.651411	-0.0617622	1.13526	0.0419826	1.68581	0.0233414	1.13661	-0.00303591	0.837667
v38	Furan, 2-methyl-	-0.0453102	1.16905	0.0114229	0.647697	-0.0377538	0.899511	-0.0151407	0.943327	-0.0621011	1.19771	#N/A	#N/A	#N/A	#N/A
v39	Hexanal	-0.0387574	1.48185	-0.023319	0.681297	-0.00749248	1.0989	-0.0492341	0.836151	-0.00525742	0.585679	0.0145227	0.598914	0.0392547	1.22592
v40	Hexanoic acid	-0.115438	1.46473	0.0330606	0.61325	-6.17383e-06	1.49869	0.00100923	1.42353	0.00371913	0.871723	-0.0325816	0.831703	-0.00693351	0.562013
v41	Hexanoic acid, 1-methylethyl ester	0.0216028	0.940589	-0.0200776	0.556791	0.0258546	0.870662	-0.0340546	1.19502	-0.00150644	0.789689	0.030286	1.01917	-0.0155899	0.675941
v42	Hexanoic acid, ethyl ester	0.014486	0.851488	-0.00818981	0.783035	-0.0310244	1.33146	-0.0120675	0.757114	0.00981353	0.653239	-0.0197235	0.690775	-0.00270377	1.1729
v43	Hexanoic acid, hexyl ester	-0.000545349	1.12349	-0.000578042	0.908675	0.0161056	0.963266	-0.0246075	0.768615	-0.0611066	1.53913	0.0287586	0.764101	-0.0267992	1.1806
v44	Hexanoic acid, methyl ester	-0.0571103	0.982607	-0.01859	0.85837	-0.0149835	0.789642	-0.0244532	1.10876	-0.00484918	0.849168	0.0041743	0.797084	0.0126201	0.416804
v45	Hexanoic acid, octyl ester	-0.0163787	1.18657	-0.0165212	0.655245	-0.0353018	1.40611	0.0123834	0.880662	0.0141703	0.583851	0.0221755	0.768233	0.00624164	0.927309
v46	Hexanoic acid, propyl ester	-0.0490968	1.00718	-0.00567439	0.642505	0.0493004	1.32369	-0.0344745	1.02287	-0.0267294	0.838131	-0.0294455	1.03253	-0.00319845	1.22689
v47	Acetic acid, 1-methylethyl ester	0.0721459	0.952083	0.0315375	0.880899	0.0695453	1.69301	-0.0641981	1.0207	-0.0169916	0.984613	0.0543278	1.94042	-0.0164053	1.29281
v48	Butanoic acid, 1-methylethyl ester	0.034717	1.0213	-0.00184342	1.0922	0.0150056	0.709916	-0.0314937	1.11896	-0.00759011	0.79292	0.0395807	1.57763	-0.019553	0.904212
v49	Linalool	-0.0480865	1.04899	0.00685888	1.17644	0.0406142	1.17742	-0.00645691	0.103595	-0.0154271	0.419696	0.0016671	1.30136	0.00823714	1.08929
v50	Methanethiol	0.0754483	1.45731	0.0162419	1.24349	0.049084	1.2158	-0.00516798	0.404312	-0.00405467	0.374213	0.0303554	1.51994	0.00104648	0.542135
v51	2-Pentanone, 4-methyl-	-0.045264	1.09982	-0.0183378	0.515603	0.00994412	0.642283	-9.5659e-05	0.430745	-0.0816055	1.89591	0.0315034	0.744403	-0.00743669	0.826998
v52	Butanoic acid, 3-methyl-, methyl ester	0.0146982	0.828436	0.0599958	1.23108	0.0140786	1.28234	0.00301765	0.6061	0.0171846	0.603413	0.0179501	1.00264	0.0078958	0.507697
v53	Acetic acid, thio-, S-methyl ester	-0.00412337	0.286013	0.04574	1.43837	0.00438868	0.361416	-0.0530539	1.37392	0.00639599	0.47938	-0.0165246	1.0529	-0.00978016	0.500524
v54	Pentanoic acid, methyl ester	0.0385092	0.650518	-0.0218794	0.52343	-0.0288728	0.736479	-0.0156232	1.07731	0.0352027	0.82592	0.0231519	1.08759	-0.0121258	0.637359
v55	Myrtenyl acetate	-0.057621	0.821388	-0.040832	0.97005	0.0605986	1.55801	0.0193758	0.964145	-0.0163817	0.499016	#N/A	#N/A	#N/A	#N/A
v56	Nonanal	-0.0909492	1.68078	-0.0925876	1.83443	-0.0145748	0.396151	-0.0889271	1.4052	-0.033474	0.905444	-0.015384	1.12845	-0.0510747	1.81929
v57	Acetic acid, propyl ester	-0.0840378	1.29063	-0.00651423	0.463108	0.0289258	0.870195	0.0366264	1.30003	-0.0019741	1.28861	0.0114787	0.555967	0.00755685	0.578817
v58	Octanoic acid, ethyl ester	-0.0168833	0.92956	-0.0329589	0.900994	-0.0419128	1.32777	-0.0107269	0.638307	-0.0258079	0.944465	-0.0494706	1.3787	0.00371399	1.21202
v59	Octanoic acid, methyl ester	-0.0240645	0.8143	-0.0774531	1.69362	-0.0275499	0.770257	-0.0161884	1.25863	-0.00739228	0.873329	-0.0147453	0.475248	0.0180255	0.83672
v60	Pentanal	-0.0493016	1.51645	0.0346835	1.14992	0.0186604	1.05299	0.0386724	1.17606	0.0256122	0.910399	0.0314912	1.01428	-0.00616864	0.706793
v61	Pentanoic acid, ethyl ester	-0.0144404	0.600737	-0.0179977	0.495169	0.00179922	0.890637	-0.00307868	0.528358	-0.0223969	1.00334	0.00183072	0.177762	-0.021715	1.37016
v62	Propanoic acid, ethyl ester	0.0344569	0.555003	0.0969876	1.85874	0.0226793	0.74173	-0.0360885	0.904632	0.0173084	1.28302	0.0296947	1.13167	0.00939083	0.698316
v63	2-Hexen-1-ol, (E)-	-0.00778735	0.639908	-0.00534849	1.30646	0.032898	0.982668	-0.00287273	0.661062	-0.0518579	1.4265	0.00256685	0.334253	-0.0342875	1.29283
v64	Butanoic acid	0.0851461	1.21915	-0.0372409	0.928554	-0.00357037	1.35252	0.0124939	1.41711	-0.00997557	1.0194	-0.0167319	0.37828	0.00849743	0.49803
v65	Butanoic acid, 2-methyl-	-0.0201443	1.13362	-0.0602801	1.36744	-0.0470867	1.11636	0.0287862	0.945423	0.0218398	0.677142	0.0109521	0.736168	0.00479779	0.551029
v66	Butanoic acid, 2-methyl-, ethyl ester	-0.0356767	0.63827	-0.0259149	1.04642	-0.0292911	0.943275	0.00989841	0.874453	-0.0276164	1.57709	-0.00184329	0.60756	0.0193643	0.674154
v67	Butanoic acid, 2-methyl-, methyl ester	-0.101992	1.46089	-0.0371067	0.841337	-0.0329847	0.86293	0.00593324	0.230141	-0.0460048	0.988665	0.0208166	1.25103	-0.00710003	1.12869
v68	Butanoic acid, 3-methyl-	-0.0200114	0.585068	-0.0124701	0.472615	0.00787553	0.700024	0.00380557	1.08647	-0.0484026	1.51269	0.0346614	1.38653	-0.0134409	0.583361
v69	delta-Decalactone											0.00299432	0.640891	-0.000282311	1.03303
v70	Furaneol											-0.00100789	0.832113	0.0480941	1.50096
v71	Furan, 3-methyl-											0.0296613	0.86095	0.0141478	0.924826
R2			92.74		72.34		83.31		84.46		78
RMSEP			0.6376		0.5841		0.5412		0.9425		0.5137

## Sheet: Mean_Overripe
		2009		2010		2015		2016		2017		2018		2019
		Coef	VIM	Coef	VIM	Coef	VIM	Coef	VIM	Coef	VIM	Coef	VIM	Coef	VIM
SSC		-0.0542873	0.94101	0.0437462	1.16798	0.00165847	0.617205	0.064423	1.57763	-0.00306648	0.590505	0.0378074	0.986341	-0.000878692	0.40475
TA		-0.0465079	1.02118	0.12759	1.95418	-0.073786	1.16373	0.0915081	1.31561	0.00653599	1.17994	0.0205162	0.594064	0.00755146	0.400372
SSC/TA		-0.00255313	0.875351	-0.0609684	1.00706	0.0504571	0.833067	-0.00193892	0.876219	-0.0181655	1.02751	0.0243192	1.02245	-0.0161379	0.474114
Mean_Firm				-0.242482	2.54942	-0.102242	2.06696	-0.0862914	1.65477	-0.101837	2.59717	-0.130552	2.27044	-0.0546526	1.52715
v1	alpha-Terpineol	-0.00737496	1.07163	0.0434235	0.959397	-0.0215915	0.869247	0.0417467	1.03505	-0.00242291	0.387609	0.0471042	0.973666	0.0557367	2.34463
v2	beta-Myrcene	0.0449239	0.770518	0.00768442	0.709498	-0.020031	1.16695	-0.0469945	1.14951	0.00553792	0.232504	-0.00127678	0.572127	0.0513992	2.27748
v3	gamma-Dodecalactone	0.0571339	0.910708	-0.0784198	1.19418	0.0397424	1.03466	0.0625599	1.58471	0.00765964	0.457091	0.0615521	1.38169	0.00554928	1.34653
v4	Nerolidol	-0.0525634	1.29019	0.065928	0.938957	-0.0273445	1.38555	0.0274529	0.926636	-0.0302464	0.991047	0.00098485	0.555696	0.00707546	0.619544
v5	Acetic acid, 3-methylbutyl ester	0.0406486	1.01907	-0.0364646	1.02832	-0.0340048	0.939937	-0.0440447	0.812772	0.047527	1.7999	-0.0396818	1.30118	-0.0195054	0.693268
v6	gamma-Decalactone	0.013516	1.16291	-0.0406069	0.836561	0.0115393	0.282487	0.0588222	1.47725	0.0236019	0.73143	0.0708543	1.46301	0.04397	1.75155
v7	2,3-Butanedione	0.0457594	1.3284	0.0196165	0.990713	-0.0235295	0.755195	-0.0548558	0.641659	-0.00317031	1.18291	-0.00844504	0.84884	-0.0279395	0.958567
v8	2-Butanone	0.0516788	1.36661	0.0851812	1.36434	-0.0506377	1.26799	0.0774948	0.855399	-0.0157034	0.96163	-0.0499789	0.950875	0.0356043	1.86537
v9	2-Heptanone	-0.00507224	1.22036	0.0449883	0.971209	-0.128938	1.89462	0.0838731	1.94519	0.0167903	0.794977	0.0511211	0.992652	-0.0311858	1.3491
v10	Acetic acid, (Z)-2-hexenyl ester	-0.00956422	0.433501	0.00284392	0.928566	0.0454454	1.16313	-0.0195621	1.5089	0.0453008	1.36359	0.0222506	0.819666	-0.021053	0.758115
v11	2-Hexenal, (E)-	-0.0991761	1.61577	0.01478	0.917469	-0.0463799	1.19658	0.0246307	0.908388	-0.00828405	0.658313	0.00819869	0.872044	-0.0188791	0.697563
v12	2-Pentenal, (E)-	0.0150024	0.297814	0.0323844	0.716161	-0.0562206	0.932251	0.0528796	0.935296	-0.0370726	1.01668	-0.00716545	0.588821	0.000370496	0.386866
v13	Mesifuran	0.0268391	0.914746	-0.00305084	0.851358	-0.040014	0.572313	0.00722333	0.728588	-0.0530616	1.46523	0.0168522	0.900198	-0.000257438	0.328811
v14	5-Hepten-2-one, 6-methyl-	0.000511634	0.701683	-0.0494307	0.937425	-0.0212858	1.05951	0.0273783	0.430088	-0.0461877	1.30967	-0.00583287	0.775772	-0.0319317	0.880883
v15	Acetic acid, 2-phenylethyl ester	-0.0252153	0.756231	-0.00206314	0.589625	-0.0278394	1.53879	-0.0542736	0.636116	-0.0136129	0.842628	0.0562732	1.2672	0.0223581	1.14327
v16	Acetic acid, butyl ester	-0.000871359	1.08926	0.0484164	1.04363	0.0729838	1.42553	-0.00875131	0.281703	-0.0298261	0.934842	-0.0456444	1.19515	-0.0238407	0.870952
v17	Acetic acid, hexyl ester	0.0077476	0.876316	-0.0229531	0.986043	0.0269473	0.608757	0.00354738	1.24682	0.0417621	0.947569	-0.00992974	1.04678	-0.00250741	0.40552
v18	Acetic acid, methyl ester	0.032209	0.794113	-0.0488992	1.01793	0.00572107	0.897878	0.0442613	0.626536	0.00455791	0.174841	0.0348341	0.919297	0.0291401	0.868196
v19	Acetic acid, nonyl ester	0.0681961	1.21437	-0.0366911	0.725566	0.042212	0.775555	0.0326444	0.424954	-0.0217033	0.515286	0.0424264	1.02348	0.0119438	0.865576
v20	Acetic acid, octyl ester	0.0134881	0.964624	-0.0599895	0.929301	0.0130498	0.242096	0.00617451	0.552459	-0.036389	1.28857	-0.00541052	0.974038	-0.0159523	0.790416
v21	Acetic acid, pentyl ester	0.0015789	0.920242	0.0147968	0.871855	0.0514377	0.812203	-0.0235799	0.478415	-0.00425888	0.472475	-0.0306348	1.18618	-0.0162255	0.589541
v22	Acetic acid, phenylmethyl ester	-0.0923111	1.56838	0.0550741	0.905327	-0.0430258	1.41988	-0.0273053	0.540445	0.049266	1.08544	0.0206797	0.963731	0.000733312	0.415463
v23	Benzaldehyde	0.0145252	0.688903	-0.0398966	1.51649	0.00589502	0.843512	-0.0212389	0.433776	0.00812589	0.527723	0.00323134	1.07461	0.00868611	0.639854
v24	Butanethioic acid, S-methyl ester	0.0638614	1.09412	0.0110971	0.601458	0.00880179	1.15475	-0.0128353	0.832473	0.00155043	0.537947	-0.00731407	0.838472	0.0366251	1.17104
v25	Butanoic acid, 3-methyl-, ethyl ester	-0.0850994	1.40381	0.0338973	0.628953	-0.015758	0.292843	-0.000984204	0.493851	0.0551821	1.80693	0.0172559	1.27996	-0.00355054	0.528182
v26	Butanoic acid, 3-methylbutyl ester	0.0390371	1.36393	-0.0671035	1.14072	-0.00273835	0.396503	0.00402392	0.331273	0.0230359	1.48515	0.0486697	1.32941	0.00245835	0.856414
v27	Butanoic acid, butyl ester	0.0041595	1.09357	0.0392964	0.854032	0.0220922	0.898076	0.048236	1.2816	-0.0118504	0.504764	-0.00252748	1.02248	0.00766712	0.783452
v28	Butanoic acid, ethyl ester	0.0238914	0.704348	0.0710565	0.758534	0.0331154	0.654547	0.00253737	0.476071	-0.0148923	0.51797	-0.0225862	1.00338	0.0108835	0.743894
v29	Butanoic acid, hexyl ester	0.0156974	1.11351	-0.00334501	1.00068	0.000858715	0.522745	0.00954169	0.691327	-0.00445857	0.528676	0.000361345	0.986797	0.0320928	1.27714
v30	Butanoic acid, methyl ester	0.042924	0.8328	-0.0278489	0.713839	0.0111428	0.299951	0.0276896	0.779558	-0.0174527	0.703332	-0.0122557	0.306898	0.0189831	0.819256
v31	Butanoic acid, octyl ester	-0.00740348	1.07539	-0.00574228	0.952935	0.0343732	0.887183	0.0301012	1.1276	-0.0169105	0.989462	-0.017902	1.11707	0.0118568	0.917994
v32	Butanoic acid, propyl ester	0.0552434	1.19675	0.0422978	0.68009	0.0158927	0.417963	-0.01678	0.659875	0.0201975	0.43003	-0.0222092	1.20442	0.00448648	0.76327
v33	Carbon disulfide	0.0393848	0.720803	0.00704951	0.37826	0.00412702	0.616649	-0.0325714	1.23231	0.041299	1.00368	-0.0567838	1.16909	0.0100413	0.970791
v34	(Z)-Linalool oxide	0.00781462	0.358032	-0.0316383	0.608934	0.0233911	0.552271	0.0394073	0.497366	-0.0163833	0.68677	0.0439355	0.87623	0.0257193	1.5267
v35	Disulfide, dimethyl	0.0446791	0.725382	0.0252391	0.811336	0.00160745	1.31668	-0.058722	1.43929	0.0254448	0.662775	#N/A	#N/A	#N/A	#N/A
v36	D-Limonene	0.0506573	1.0036	0.102384	1.40593	-0.0536867	1.47324	-0.0814116	1.11124	-0.00335154	0.441029	0.0222208	0.840322	0.0193492	1.77825
v37	Acetic acid, ethyl ester	-0.0386945	0.728526	0.021075	0.340899	0.00593613	0.893909	-0.00694231	1.03257	-0.045752	1.41571	-0.0668909	1.2105	0.0157319	0.693732
v38	Furan, 2-methyl-	0.0241756	0.914835	-0.0107897	1.04308	-0.021716	0.82342	0.00689987	1.10604	-0.0327496	0.78795	#N/A	#N/A	#N/A	#N/A
v39	Hexanal	-0.00014798	0.78969	0.00720404	0.657126	0.0278555	0.63159	-0.00168662	1.00551	0.0335577	0.851795	0.00746091	0.927452	0.00999751	0.412624
v40	Hexanoic acid	0.0679116	0.997123	-0.0211559	0.653673	0.0135064	0.359105	0.05884	1.68437	-0.00308423	0.574099	0.0496946	1.2258	0.00967946	0.712054
v41	Hexanoic acid, 1-methylethyl ester	-0.00672267	1.02362	0.0439108	1.30971	-0.0482399	1.09103	-0.0159716	0.990328	-0.0195142	1.07567	0.00503049	0.483295	-0.0221618	0.758874
v42	Hexanoic acid, ethyl ester	-0.0061311	0.873146	-0.00415287	0.366769	-0.0202233	0.853651	0.00920012	0.654874	0.0192571	0.684125	0.00350653	0.878626	-0.012434	0.563106
v43	Hexanoic acid, hexyl ester	0.00580926	1.10889	0.0107796	1.05476	-0.0204535	0.470991	-0.026445	0.591639	0.0158545	0.751833	-0.00379133	0.958917	0.0259544	1.18529
v44	Hexanoic acid, methyl ester	0.0410928	0.714745	-0.0881964	1.38972	-0.0206589	1.31454	0.00193642	0.929523	-0.00609431	0.751794	0.0106791	0.443962	-0.031838	1.03934
v45	Hexanoic acid, octyl ester	-0.0141894	1.20738	0.0588435	1.06948	-0.00441428	0.117376	0.047782	1.41692	-0.0171418	0.987399	-0.0204783	1.14839	0.00565606	0.798172
v46	Hexanoic acid, propyl ester	-0.000639735	0.997407	0.12101	1.45821	-0.0679462	1.3671	-0.00735638	0.348726	0.0484443	1.04265	0.0041885	1.04906	-0.00582008	0.701629
v47	Acetic acid, 1-methylethyl ester	0.0132041	0.949873	0.0226791	0.590665	-0.0118156	0.593452	-0.0162722	0.839137	-0.0272659	1.18851	0.00119488	0.706289	-0.0212226	0.969866
v48	Butanoic acid, 1-methylethyl ester	0.0074046	0.873613	0.022347	0.929331	0.0269112	0.992443	0.00353663	0.906295	-0.0265271	1.16665	-0.0368948	0.671117	0.00916773	0.683796
v49	Linalool	0.0437722	1.04068	0.0303334	0.845245	-0.0034612	0.91029	0.0536119	0.856187	0.00969831	0.264368	0.00424789	0.663697	0.0513789	2.16935
v50	Methanethiol	0.0087312	0.747764	0.00829236	0.772675	0.03361	0.943195	-0.0321272	0.923497	0.0289632	0.804726	-0.023074	0.676311	0.00556146	0.375606
v51	2-Pentanone, 4-methyl-	0.064979	1.34536	-0.00722317	1.2218	-0.00468956	0.365812	-0.000603032	0.405465	0.0542968	1.87508	-0.00652151	0.753535	0.0243236	1.42338
v52	Butanoic acid, 3-methyl-, methyl ester	0.0246009	1.05276	-0.093635	1.02384	0.0457076	0.700618	0.000340696	0.446554	-0.0163761	0.588272	0.0348859	1.40514	0.0310928	0.918174
v53	Acetic acid, thio-, S-methyl ester	0.0436869	0.71826	-0.0386302	0.945905	0.0128817	1.42919	-0.0312672	1.05531	0.0182796	0.598571	0.0178718	0.620225	0.00455131	0.495566
v54	Pentanoic acid, methyl ester	-0.0342881	0.877008	-0.0118475	0.486287	0.00851181	0.595846	-0.0131697	0.521574	-0.0178154	0.69302	-0.0357825	0.829649	0.00430497	0.49579
v55	Myrtenyl acetate	0.0293916	0.821198	0.0563304	0.685423	0.0129984	0.814785	-0.0291543	0.416696	-0.0561663	1.50218	#N/A	#N/A	#N/A	#N/A
v56	Nonanal	0.065314	1.09674	-0.0567683	0.922722	-0.0288311	0.766663	-0.0392237	0.944165	0.029283	0.723541	0.0183715	0.882953	0.00411643	1.00032
v57	Acetic acid, propyl ester	0.0162446	0.898941	0.0625464	0.910861	0.00206659	1.02041	0.0330776	1.21487	-0.000799555	0.504211	0.00725329	0.712136	0.0117511	0.560534
v58	Octanoic acid, ethyl ester	-0.00282603	0.861476	0.0487374	0.732423	-0.015682	0.780677	-0.00998646	0.610145	0.0380942	0.952668	-0.00877252	0.664148	0.000900529	0.670629
v59	Octanoic acid, methyl ester	-0.0136402	0.617962	-0.0316897	0.753826	-0.0146035	1.35043	0.0177587	1.18821	-0.0041349	0.841033	0.0254279	0.943209	-0.0227534	0.88256
v60	Pentanal	0.0289641	0.816854	0.0101667	0.706235	0.0246602	0.892594	0.0255694	0.758965	-0.0219423	0.70598	-0.014007	0.632225	0.0186655	0.73101
v61	Pentanoic acid, ethyl ester	-0.0115693	0.621762	0.0830101	0.977452	0.0147972	0.865037	-0.0417416	0.74646	0.0271577	1.08647	-0.0221735	1.00782	0.00812544	0.774554
v62	Propanoic acid, ethyl ester	-0.00710007	0.818325	-0.0258915	0.377439	-0.0251996	1.35399	-0.011653	1.0449	-0.0382802	1.26928	-0.0443482	1.07517	0.00819091	0.616353
v63	2-Hexen-1-ol, (E)-	-0.0401186	1.22531	0.0896189	1.42064	0.0690457	1.74654	-0.0362763	1.31939	0.0391499	1.06183	0.0903552	1.67324	0.00607435	0.199105
v64	Butanoic acid	-0.0624775	1.02812	0.09767	1.09434	0.0614635	1.18694	0.072203	1.65169	-0.00389233	0.508395	0.0261085	0.940601	0.00306131	0.692737
v65	Butanoic acid, 2-methyl-	0.0289915	1.19297	0.0205703	0.754823	-0.0453172	1.25901	0.0424777	1.48694	0.0011149	0.832755	2.4363e-05	0.415677	0.0356826	1.51738
v66	Butanoic acid, 2-methyl-, ethyl ester	-0.000101978	0.549874	-0.0774462	0.910672	-0.0247707	1.03043	-0.0160851	1.13012	-0.0348643	1.49478	-0.0202578	0.370623	0.0079251	0.53519
v67	Butanoic acid, 2-methyl-, methyl ester	0.100719	1.51232	-0.0614658	0.920349	0.0581339	0.867851	0.0227246	0.677459	-0.00109538	0.875936	-0.00129324	0.727625	0.0109992	0.681277
v68	Butanoic acid, 3-methyl-	0.0487978	0.984983	0.0655113	1.16697	-0.000950729	0.456278	0.0259277	0.961513	0.0239378	0.990676	0.0536975	1.07076	-0.0291175	0.81408
v69	delta-Decalactone											0.00171269	0.942128	0.0194745	1.2436
v70	Furaneol											0.0374881	1.25903	-0.0277787	0.853832
v71	Furan, 3-methyl-											-0.02123	0.972242	0.0167759	0.622229
R2		84.45		1.008		0.5666		1.085		0.3048
RMSEP		0.7078		73.87		91.1		85.21		90.42

## Sheet: Mean_Woody
		2009		2010		2015		2016		2017		2018		2019
		Coef	VIM	Coef	VIM	Coef	VIM	Coef	VIM	Coef	VIM	Coef	VIM	Coef	VIM
SSC		-0.015115	1.17854	0.00925506	1.30596	0.0296589	0.722991	0.0301195	1.40292	-0.0337465	1.63529	-0.0199205	1.01287	-0.0318104	1.17642
TA		-0.00220561	1.09815	0.0270213	1.11143	-0.0622276	1.34162	0.0442155	1.2555	-0.0140605	0.999769	-0.050686	1.61426	-0.0310168	1.38824
SSC/TA		-0.0072771	1.50035	-0.0183048	0.61097	0.0757025	1.49125	0.001651	0.623225	-0.0211958	0.830658	0.0320441	1.35452	-0.00981142	0.50335
Mean_Firm				-0.0386246	0.836015	-0.0114578	0.769049	-0.0624247	1.59259	-0.0411526	1.68781	-0.0439534	1.49841	-0.0346704	0.850841
v1	alpha-Terpineol	-0.00225561	1.28182	0.0121925	1.18926	0.00171541	0.954841	0.0234425	0.937762	-0.00263134	1.21415	0.0186176	0.751039	0.0319821	1.3641
v2	beta-Myrcene	-0.00917215	0.478996	-0.0131167	1.02668	-0.0279737	1.11711	-0.0371622	1.19858	-0.0087199	1.07528	-0.00292857	0.148391	-0.0250205	1.30037
v3	gamma-Dodecalactone	-0.00290504	0.661597	-0.027089	1.31497	0.0447459	1.21246	0.043918	1.4314	0.0125219	1.46315	-0.0181376	1.07854	-0.0229868	0.989239
v4	Nerolidol	-0.0304693	1.72994	0.0194582	0.976977	0.01208	1.1933	0.0153178	0.937478	-0.00742217	0.637274	-0.00581946	0.718397	0.0385922	1.48814
v5	Acetic acid, 3-methylbutyl ester	-0.00838718	0.603469	0.00411433	0.462124	-0.0146873	0.964161	-0.0275304	0.928025	-0.00675637	0.695902	0.0170595	0.715123	0.0209888	0.576904
v6	gamma-Decalactone	-0.00315552	1.04684	-0.00335154	1.00928	0.0359024	0.779406	0.0352802	1.1626	0.024828	1.58619	0.0010563	1.13418	0.00697252	0.819502
v7	2,3-Butanedione	-0.000232218	1.05302	0.00389914	0.885167	-0.0357493	0.910851	-0.0427405	0.793575	0.022433	1.0264	-0.0133589	0.896196	0.0230255	1.02027
v8	2-Butanone	-0.0138972	1.35001	0.0246654	1.26813	-0.0464718	1.26951	0.0197425	0.495916	0.0151295	1.41364	-0.000803242	0.730558	0.0324244	0.989521
v9	2-Heptanone	-0.012733	1.26499	0.0153995	0.998586	-0.119228	2.28149	0.0286826	1.06055	0.00479862	0.532624	0.0210727	0.856112	-0.0328395	1.42289
v10	Acetic acid, (Z)-2-hexenyl ester	-0.00307304	0.614	0.00423274	0.811898	-0.00398578	1.00242	-0.0140299	1.42565	0.0147598	0.856926	-0.0143354	0.864865	0.0147826	0.734512
v11	2-Hexenal, (E)-	-0.0158813	1.53604	-0.0443237	1.53805	-0.0175076	1.04218	0.0424977	1.61249	0.0131863	0.648424	0.0154983	0.78589	-0.0203089	0.885399
v12	2-Pentenal, (E)-	-0.000316039	0.523117	-0.0092501	0.5211	-0.0141716	0.561726	0.0300926	1.03799	-0.000630105	0.527113	0.000333265	0.961152	-0.00253851	0.936313
v13	Mesifuran	0.0073263	0.883872	-0.00671087	1.1007	-0.0303743	0.684739	-0.0129143	0.451293	-0.0225396	1.21798	0.0361993	1.32242	0.0410896	1.19646
v14	5-Hepten-2-one, 6-methyl-	-0.01284	1.34361	-0.00450645	1.13394	-0.0132728	1.03766	-0.00486118	0.404119	-0.00854379	0.804104	-0.0168229	0.673445	0.0247571	0.930679
v15	Acetic acid, 2-phenylethyl ester	-0.0287538	1.66819	0.00069957	0.457842	0.00162826	1.32946	-0.0574622	1.37137	-0.00296997	1.31115	-0.00338247	0.928734	0.0344073	1.0803
v16	Acetic acid, butyl ester	-0.00547724	0.430638	0.0201695	0.778171	0.0497626	0.976818	-0.0163828	0.3257	0.0191771	0.70575	0.00369631	0.935841	0.0465274	1.13617
v17	Acetic acid, hexyl ester	-0.00529493	0.461648	-0.00063665	1.06067	-0.0083884	0.59453	-0.00313951	1.26509	0.0358786	1.5328	-0.00170516	1.09673	0.00639783	0.415297
v18	Acetic acid, methyl ester	0.0177036	1.12855	0.00485078	0.761267	0.0186774	1.05756	0.0236193	0.569224	0.0138437	1.22353	-0.00274301	0.872153	0.0132098	0.797834
v19	Acetic acid, nonyl ester	0.0129969	0.849893	0.046309	0.989692	0.0626328	1.30388	0.011514	0.507478	-0.0264967	1.09635	-0.0211715	1.1213	0.0375576	1.01095
v20	Acetic acid, octyl ester	-0.00861574	0.67941	-0.031031	1.0068	-0.0345347	0.636573	0.00644481	0.458528	0.0132007	0.619142	0.00252696	1.08224	0.0334058	0.937272
v21	Acetic acid, pentyl ester	-0.00651107	0.500837	-0.0125692	0.996527	0.0225037	0.544439	-0.0314039	1.0952	0.0191458	0.717102	0.00567272	1.11012	-0.0480522	1.33086
v22	Acetic acid, phenylmethyl ester	-0.0292961	1.77026	0.00828584	0.791264	-0.037527	1.01926	-0.00270846	0.283908	0.0419161	1.91247	-0.00755881	0.645903	-0.0691833	1.8083
v23	Benzaldehyde	0.00278868	1.03389	-0.00942938	1.41706	0.0118734	0.927307	0.0392317	1.04725	0.00715675	1.07802	-0.0235256	1.14911	0.012362	0.608152
v24	Butanethioic acid, S-methyl ester	0.0245628	1.17531	0.0108014	0.888385	-0.013495	0.665511	-0.0270534	0.702781	-0.0145638	0.84992	0.00899868	1.18555	0.00824701	0.683265
v25	Butanoic acid, 3-methyl-, ethyl ester	-0.0068982	0.530667	0.0139418	0.687953	-0.0124845	0.667468	-0.00481827	0.721771	0.0050046	0.700388	0.0213478	1.00278	-0.0267551	0.814519
v26	Butanoic acid, 3-methylbutyl ester	0.00866934	1.14868	0.012893	1.16341	-0.0084342	0.659887	-0.0175825	0.783981	-0.000901601	0.608686	0.0325945	1.28257	-0.00967262	0.787195
v27	Butanoic acid, butyl ester	0.00682565	1.04892	0.0564827	1.42013	0.0154329	0.627437	0.0213624	0.695455	0.00524839	0.513382	0.0407962	1.63452	0.0185122	0.897261
v28	Butanoic acid, ethyl ester	0.0138322	1.2745	0.0125997	0.511634	0.00384017	0.523551	0.000105609	0.828475	-0.00174233	0.526665	-0.00986215	0.783091	-0.00561631	0.502059
v29	Butanoic acid, hexyl ester	0.00504782	1.24375	0.0228005	1.35694	-0.0206874	0.431287	0.0146557	0.785697	-0.0226089	1.10174	0.0322517	1.47819	-0.0157033	0.821736
v30	Butanoic acid, methyl ester	0.00870897	0.528491	-0.018785	0.547708	-0.0403442	1.03699	0.0150641	0.565975	-0.0131734	0.794794	0.00214354	0.858635	0.0112011	0.88959
v31	Butanoic acid, octyl ester	-0.00203943	1.3068	0.0176622	1.15974	0.01617	0.563779	0.0260759	0.680751	0.00991835	0.57106	0.000508553	1.12057	0.00568484	0.841042
v32	Butanoic acid, propyl ester	0.00167527	0.733767	0.00852214	0.721455	0.0100695	0.593545	-0.0130999	1.18413	0.0128215	0.59456	0.000936728	1.07243	-0.017524	0.867982
v33	Carbon disulfide	0.00267457	0.634728	0.0143836	0.496408	-0.00686752	0.818749	0.0119346	1.45465	0.0433482	1.71058	0.021706	0.916126	0.0445274	1.36553
v34	(Z)-Linalool oxide	0.00107225	0.507646	-0.00809517	0.736928	0.0459015	1.07614	0.0587272	1.32298	-0.00710406	0.360488	-0.0142734	0.617427	0.0166576	0.440153
v35	Disulfide, dimethyl	0.00136861	0.408662	0.0417306	1.40769	0.00223631	0.896722	-0.0204499	1.25872	0.00883812	1.15979	#N/A	#N/A	#N/A	#N/A
v36	D-Limonene	0.000505419	0.332448	0.00813064	0.498327	-0.0325181	1.28534	-0.0735255	1.34902	-0.0222245	0.822523	-0.0015888	0.658734	-0.00533623	0.760191
v37	Acetic acid, ethyl ester	-0.0147947	0.814182	-0.018189	0.765077	0.00209918	1.05419	0.000810184	1.07411	-0.0185366	0.695396	-0.00823075	0.861824	-0.00345271	0.826386
v38	Furan, 2-methyl-	-0.00502761	1.33935	0.0110022	1.05148	-0.0289962	0.912638	-0.0317328	0.824225	-0.0233483	0.871435	#N/A	#N/A	#N/A	#N/A
v39	Hexanal	-7.978e-05	0.746155	-0.0305458	0.963895	-0.0164842	0.486723	-0.00424825	1.15314	0.0184125	1.41074	0.00992912	0.815228	0.0150147	0.663381
v40	Hexanoic acid	0.006151	0.502951	0.0358005	0.74656	0.0178882	0.42179	0.0295793	0.760666	-0.00583528	0.630855	-0.00774361	0.419759	-0.000576567	0.797618
v41	Hexanoic acid, 1-methylethyl ester	-0.00507697	1.03599	0.00423903	0.711292	-0.0832148	1.70384	-0.0246075	0.913118	-0.0102796	0.733378	-0.00566111	1.04136	-0.0405323	1.35623
v42	Hexanoic acid, ethyl ester	0.00214007	0.924962	-0.0225357	0.847949	-0.0142561	0.957822	0.00151213	0.901113	0.0185923	0.706738	-0.0119034	0.991416	-0.000161591	0.237945
v43	Hexanoic acid, hexyl ester	-0.0033134	1.29703	0.0255731	1.38764	-0.0228872	0.580006	-0.0176659	0.95737	-0.0131174	0.82424	0.0332498	1.45141	-0.0365305	1.18953
v44	Hexanoic acid, methyl ester	-0.00231836	0.619867	-0.031091	0.913788	-0.0222769	1.39802	-0.0146954	0.82717	0.00259832	0.465998	0.00683959	1.26961	-0.0157543	0.98411
v45	Hexanoic acid, octyl ester	-0.0145512	1.44701	0.0391836	1.2951	-0.00090011	0.108373	0.031396	0.948541	0.0136694	0.744143	0.011377	1.16246	-0.00412829	0.784475
v46	Hexanoic acid, propyl ester	-0.00612573	1.27179	0.0362262	1.01744	-0.0318581	0.883632	-0.00946731	0.87197	0.0373039	1.38762	0.00218722	1.04448	-0.0131366	0.588318
v47	Acetic acid, 1-methylethyl ester	0.0199376	1.09501	0.00552033	0.447041	-0.00339637	0.5725	-0.017976	0.969237	0.00436823	1.01184	0.00367892	0.800803	-0.0225314	0.561706
v48	Butanoic acid, 1-methylethyl ester	0.00570542	0.940871	0.0307473	1.24466	-0.0538635	1.18906	-0.00719361	0.853007	-0.010383	0.77626	-0.00455962	0.329981	0.00560189	1.01395
v49	Linalool	0.00199931	0.843987	-0.000645153	1.10337	0.0224683	1.04844	0.04823	1.17095	0.00230201	1.03451	-0.000100929	0.237388	-0.0256395	1.27431
v50	Methanethiol	0.0145447	1.52794	-0.00620443	1.13758	0.00779745	0.804197	-0.00715746	0.754322	0.0326773	1.68162	0.00778556	0.647815	0.0201155	0.761526
v51	2-Pentanone, 4-methyl-	0.00663341	0.650437	0.011007	0.909716	-0.00218565	0.579974	-0.0486692	0.938264	-0.00187885	0.589176	0.0349861	1.21641	-0.00411732	0.879549
v52	Butanoic acid, 3-methyl-, methyl ester	0.0148511	0.769137	0.00609851	0.424961	0.033999	0.624238	0.00160246	0.818666	-0.00286234	0.50384	-0.0044186	0.969065	0.0259502	0.901972
v53	Acetic acid, thio-, S-methyl ester	0.0157455	1.01583	-0.00767443	1.17819	0.0410475	1.03354	-0.0640485	1.2412	0.0120767	0.897619	-0.0249987	1.0824	-0.0147558	0.776659
v54	Pentanoic acid, methyl ester	-0.0132192	0.634501	-0.0283104	0.667888	-0.0507811	1.37966	-0.0281358	0.85653	-0.0107571	0.54962	-0.00970344	0.513786	-0.0194646	1.15892
v55	Myrtenyl acetate	-2.81579e-05	0.543716	0.0329762	0.860844	-0.0159818	0.983861	-0.0077759	0.617494	-0.0255376	1.02238	#N/A	#N/A	#N/A	#N/A
v56	Nonanal	-0.00170394	0.817098	-0.0383897	1.16312	-0.0037353	0.201465	-0.0402886	1.38482	0.0290565	1.47814	-0.0105032	0.807724	-0.0439313	1.37921
v57	Acetic acid, propyl ester	-0.0102063	0.616304	0.0246217	0.504721	0.0127587	1.12569	0.00125641	1.03342	-0.00450302	0.548977	0.00201092	0.115345	0.0234001	0.953186
v58	Octanoic acid, ethyl ester	-0.00539349	0.995877	0.00384678	0.723535	-0.00399771	0.860296	-0.00641508	1.04925	0.0228194	0.838407	-0.035495	1.10404	0.00639467	0.560225
v59	Octanoic acid, methyl ester	-0.00631835	0.825881	-0.0117375	0.523363	-0.0020485	1.37618	0.00477267	0.604858	0.00481574	0.555142	0.000648191	1.28587	-0.0266821	1.10269
v60	Pentanal	0.00262826	0.726555	0.0210864	1.12822	0.00747849	0.887557	0.00348288	0.770562	0.00879185	0.523711	-0.0281582	1.23864	0.00905007	1.02369
v61	Pentanoic acid, ethyl ester	-0.00923023	0.685236	0.0106569	0.428764	0.00293012	1.1417	-0.041727	1.44212	0.0119198	0.620252	-0.0203676	0.595662	-0.0179685	1.01595
v62	Propanoic acid, ethyl ester	0.00579635	0.572545	0.0412067	0.905096	0.0121835	1.33439	-0.00311779	1.21519	-0.0166629	0.654837	0.00625246	0.911852	-0.0103586	0.732668
v63	2-Hexen-1-ol, (E)-	-0.00223551	0.653097	0.0236014	1.31194	0.0185784	1.16348	-0.0210093	1.50096	-0.0122069	1.18181	0.0026146	0.79298	-0.0328067	1.08347
v64	Butanoic acid	-0.0100944	0.860025	0.0647013	1.51973	0.0478904	0.94119	0.0290294	0.610238	0.00322565	0.646178	0.00265212	0.363459	0.0240077	0.926411
v65	Butanoic acid, 2-methyl-	-0.00434898	1.20981	-0.0178448	0.797779	-0.0543433	1.3057	0.012817	0.93187	-0.00816568	1.02713	0.0124637	0.748654	0.0298092	1.20317
v66	Butanoic acid, 2-methyl-, ethyl ester	-0.0179566	0.972062	-0.0791619	1.84712	-0.0570206	1.44027	0.0123769	0.919318	-0.0269526	1.05061	0.0153961	0.764467	0.00687781	0.683932
v67	Butanoic acid, 2-methyl-, methyl ester	0.0206321	1.22303	-0.0326402	0.708581	-0.0133644	0.5897	0.0187987	0.756994	-0.0119127	1.15751	0.00545151	0.922831	0.0195618	0.594784
v68	Butanoic acid, 3-methyl-	0.00937541	0.697654	0.0411803	1.17387	0.00276652	0.611981	-0.0306202	0.626058	0.0193389	0.883714	0.021018	0.695141	-0.0181308	0.659052
v69	delta-Decalactone											0.0363442	1.45095	-0.00270136	0.778091
v70	Furaneol											0.036975	1.42321	0.0360745	1.48962
v71	Furan, 3-methyl-											-0.0131362	0.971505	0.0632476	1.69794
R2		91.35		76.35		90.94		77.23		69.54
RMSEP		0.1891		0.4762		0.5383		0.9284		0.3882
